# Supplementary material for: Druggable Nucleolin Identifies Breast Tumours Associated with Poor Prognosis That Exhibit Different Biological Processes
Source: MDPI journal article supplement (doi:10.3390/cancers10100390), 2018-10-22
Supplement: s1 [file s1]

Annotation Cluster 1

Category

UP\_SEQ\_FEATURE  
UP\_SEQ\_FEATURE  
UP\_SEQ\_FEATURE  
UP\_SEQ\_FEATURE  
UP\_SEQ\_FEATURE  
UP\_SEQ\_FEATURE  
UP\_SEQ\_FEATURE  
UP\_SEQ\_FEATURE  
SP\_PIR\_KEYWORDS  
UP\_SEQ\_FEATURE  
INTERPRO  
INTERPRO  
PIR\_SUPERFAMILY  
INTERPRO  
INTERPRO  
GOTERM\_MF\_FAT  
UP\_SEQ\_FEATURE  
SP\_PIR\_KEYWORDS  
GOTERM\_CC\_FAT  
GOTERM\_CC\_FAT  
GOTERM\_CC\_FAT  
INTERPRO

Annotation Cluster 2

Category

GOTERM\_BP\_FAT  
GOTERM\_BP\_FAT  
SP\_PIR\_KEYWORDS  
GOTERM\_BP\_FAT  
GOTERM\_BP\_FAT  
GOTERM\_BP\_FAT  
INTERPRO  
GOTERM\_BP\_FAT  
GOTERM\_BP\_FAT  
GOTERM\_CC\_FAT

Annotation Cluster 3

Category

SP\_PIR\_KEYWORDS  
GOTERM\_CC\_FAT  
SP\_PIR\_KEYWORDS  
GOTERM\_MF\_FAT  
GOTERM\_CC\_FAT  
GOTERM\_CC\_FAT  
GOTERM\_CC\_FAT

GOTERM\_BP\_FAT  
GOTERM\_CC\_FAT  
GOTERM\_CC\_FAT  
GOTERM\_CC\_FAT  
GOTERM\_CC\_FAT

#### Annotation Cluster 4

Category  
GOTERM\_CC\_FAT  
GOTERM\_BP\_FAT  
GOTERM\_MF\_FAT

#### Annotation Cluster 5

Category  
KEGG\_PATHWAY  
SP\_PIR\_KEYWORDS  
GOTERM\_CC\_FAT  
GOTERM\_BP\_FAT  
GOTERM\_BP\_FAT  
GOTERM\_BP\_FAT  
GOTERM\_BP\_FAT  
INTERPRO  
GOTERM\_BP\_FAT  
SP\_PIR\_KEYWORDS  
GOTERM\_BP\_FAT  
GOTERM\_MF\_FAT  
GOTERM\_MF\_FAT  
GOTERM\_BP\_FAT  
SP\_PIR\_KEYWORDS  
GOTERM\_BP\_FAT  
GOTERM\_CC\_FAT  
GOTERM\_BP\_FAT  
GOTERM\_BP\_FAT  
GOTERM\_BP\_FAT  
GOTERM\_BP\_FAT  
GOTERM\_BP\_FAT  
GOTERM\_BP\_FAT  
INTERPRO  
GOTERM\_BP\_FAT  
GOTERM\_BP\_FAT  
INTERPRO  
GOTERM\_BP\_FAT  
GOTERM\_BP\_FAT  
SP\_PIR\_KEYWORDS  
INTERPRO  
GOTERM\_BP\_FAT  
GOTERM\_BP\_FAT  
GOTERM\_BP\_FAT  
GOTERM\_BP\_FAT

GOTERM\_BP\_FAT  
GOTERM\_BP\_FAT  
GOTERM\_BP\_FAT  
GOTERM\_BP\_FAT  
GOTERM\_BP\_FAT  
GOTERM\_BP\_FAT  
GOTERM\_BP\_FAT

#### Annotation Cluster 6

Category  
INTERPRO  
INTERPRO  
UP\_SEQ\_FEATURE  
PIR\_SUPERFAMILY  
UP\_SEQ\_FEATURE  
SP\_PIR\_KEYWORDS  
UP\_SEQ\_FEATURE  
UP\_SEQ\_FEATURE  
INTERPRO  
INTERPRO  
INTERPRO  
INTERPRO

#### Annotation Cluster 7

Category  
BIOCARTA  
KEGG\_PATHWAY  
SMART  
SP\_PIR\_KEYWORDS  
INTERPRO  
INTERPRO  
GOTERM\_CC\_FAT  
SP\_PIR\_KEYWORDS  
GOTERM\_BP\_FAT  
GOTERM\_BP\_FAT  
SP\_PIR\_KEYWORDS  
GOTERM\_BP\_FAT  
GOTERM\_CC\_FAT  
GOTERM\_BP\_FAT  
GOTERM\_BP\_FAT  
GOTERM\_BP\_FAT  
GOTERM\_BP\_FAT  
GOTERM\_BP\_FAT  
SP\_PIR\_KEYWORDS  
GOTERM\_BP\_FAT

#### Annotation Cluster 8

Category  
INTERPRO

SMART  
UP\_SEQ\_FEATURE  
INTERPRO  
INTERPRO  
PIR\_SUPERFAMILY  
SP\_PIR\_KEYWORDS

Annotation Cluster 9

Category  
INTERPRO  
GOTERM\_MF\_FAT  
SMART  
GOTERM\_MF\_FAT  
INTERPRO  
SP\_PIR\_KEYWORDS  
GOTERM\_MF\_FAT  
SP\_PIR\_KEYWORDS  
INTERPRO  
UP\_SEQ\_FEATURE  
UP\_SEQ\_FEATURE  
GOTERM\_MF\_FAT  
SMART  
PIR\_SUPERFAMILY  
INTERPRO  
UP\_SEQ\_FEATURE  
UP\_SEQ\_FEATURE

Annotation Cluster 10

Category  
SMART  
SP\_PIR\_KEYWORDS  
UP\_SEQ\_FEATURE  
INTERPRO  
INTERPRO  
GOTERM\_MF\_FAT  
INTERPRO  
GOTERM\_MF\_FAT  
UP\_SEQ\_FEATURE  
GOTERM\_MF\_FAT  
GOTERM\_MF\_FAT  
GOTERM\_MF\_FAT  
GOTERM\_MF\_FAT  
SP\_PIR\_KEYWORDS  
GOTERM\_MF\_FAT

Annotation Cluster 11

Category  
SP\_PIR\_KEYWORDS  
SP\_PIR\_KEYWORDS

GOTERM\_CC\_FAT

Annotation Cluster 12

Category

SP\_PIR\_KEYWORDS

UP\_SEQ\_FEATURE

INTERPRO

Annotation Cluster 13

Category

GOTERM\_CC\_FAT

GOTERM\_CC\_FAT

GOTERM\_CC\_FAT

GOTERM\_CC\_FAT

GOTERM\_CC\_FAT

Annotation Cluster 14

Category

INTERPRO

INTERPRO

SP\_PIR\_KEYWORDS

SP\_PIR\_KEYWORDS

INTERPRO

UP\_SEQ\_FEATURE

UP\_SEQ\_FEATURE

GOTERM\_MF\_FAT

GOTERM\_MF\_FAT

GOTERM\_MF\_FAT

GOTERM\_MF\_FAT

GOTERM\_BP\_FAT

INTERPRO

UP\_SEQ\_FEATURE

PIR\_SUPERFAMILY

INTERPRO

UP\_SEQ\_FEATURE

UP\_SEQ\_FEATURE

INTERPRO

GOTERM\_CC\_FAT

INTERPRO

SP\_PIR\_KEYWORDS

Annotation Cluster 15

Category

SP\_PIR\_KEYWORDS

GOTERM\_BP\_FAT

GOTERM\_BP\_FAT

KEGG\_PATHWAY

GOTERM\_BP\_FAT

GOTERM\_BP\_FAT  
GOTERM\_BP\_FAT  
GOTERM\_BP\_FAT  
GOTERM\_BP\_FAT  
GOTERM\_BP\_FAT  
GOTERM\_MF\_FAT

#### Annotation Cluster 16

Category  
SP\_PIR\_KEYWORDS  
GOTERM\_CC\_FAT  
SP\_PIR\_KEYWORDS  
KEGG\_PATHWAY  
UP\_SEQ\_FEATURE  
GOTERM\_CC\_FAT  
GOTERM\_CC\_FAT  
GOTERM\_BP\_FAT  
GOTERM\_CC\_FAT  
GOTERM\_CC\_FAT  
GOTERM\_CC\_FAT  
SP\_PIR\_KEYWORDS  
GOTERM\_CC\_FAT  
GOTERM\_CC\_FAT  
GOTERM\_CC\_FAT  
GOTERM\_BP\_FAT  
SP\_PIR\_KEYWORDS  
KEGG\_PATHWAY  
GOTERM\_CC\_FAT  
GOTERM\_BP\_FAT  
GOTERM\_CC\_FAT  
GOTERM\_CC\_FAT  
GOTERM\_CC\_FAT  
SP\_PIR\_KEYWORDS  
GOTERM\_BP\_FAT  
GOTERM\_BP\_FAT  
KEGG\_PATHWAY  
GOTERM\_BP\_FAT  
GOTERM\_MF\_FAT  
GOTERM\_BP\_FAT

#### Annotation Cluster 17

Category  
INTERPRO  
INTERPRO  
INTERPRO  
INTERPRO  
PIR\_SUPERFAMILY  
GOTERM\_BP\_FAT

INTERPRO  
GOTERM\_BP\_FAT

Annotation Cluster 18

Category  
GOTERM\_MF\_FAT  
SP\_PIR\_KEYWORDS  
GOTERM\_MF\_FAT  
GOTERM\_MF\_FAT  
GOTERM\_MF\_FAT  
GOTERM\_MF\_FAT  
INTERPRO

Annotation Cluster 19

Category  
GOTERM\_MF\_FAT  
UP\_SEQ\_FEATURE  
UP\_SEQ\_FEATURE  
INTERPRO  
SP\_PIR\_KEYWORDS  
SP\_PIR\_KEYWORDS  
INTERPRO  
INTERPRO  
PIR\_SUPERFAMILY  
SP\_PIR\_KEYWORDS  
SP\_PIR\_KEYWORDS  
SP\_PIR\_KEYWORDS  
UP\_SEQ\_FEATURE  
UP\_SEQ\_FEATURE

Annotation Cluster 20

Category  
SMART  
INTERPRO  
INTERPRO  
INTERPRO  
PIR\_SUPERFAMILY  
GOTERM\_BP\_FAT

Annotation Cluster 21

Category  
GOTERM\_BP\_FAT  
GOTERM\_BP\_FAT  
GOTERM\_BP\_FAT  
GOTERM\_BP\_FAT  
GOTERM\_BP\_FAT

Annotation Cluster 22

Category

KEGG\_PATHWAY

GOTERM\_BP\_FAT

SP\_PIR\_KEYWORDS

GOTERM\_BP\_FAT

GOTERM\_BP\_FAT

GOTERM\_BP\_FAT

GOTERM\_BP\_FAT

GOTERM\_BP\_FAT

GOTERM\_BP\_FAT

GOTERM\_BP\_FAT

GOTERM\_BP\_FAT

Annotation Cluster 23

Category

UP\_SEQ\_FEATURE

UP\_SEQ\_FEATURE

PIR\_SUPERFAMILY

Annotation Cluster 24

Category

BIOCARTA

BIOCARTA

BIOCARTA

Annotation Cluster 25

Category

GOTERM\_MF\_FAT

GOTERM\_BP\_FAT

GOTERM\_MF\_FAT

Annotation Cluster 26

Category

SP\_PIR\_KEYWORDS

GOTERM\_CC\_FAT

GOTERM\_CC\_FAT

GOTERM\_CC\_FAT



Annotation Cluster 27

Category

SMART

INTERPRO

INTERPRO

Annotation Cluster 28

Category

INTERPRO

SMART

UP\_SEQ\_FEATURE

UP\_SEQ\_FEATURE

UP\_SEQ\_FEATURE

SMART

INTERPRO

INTERPRO

PIR\_SUPERFAMILY

INTERPRO

INTERPRO

Annotation Cluster 29

Category

INTERPRO

COG\_ONTOLOGY

INTERPRO

Annotation Cluster 30

Category

INTERPRO

INTERPRO

INTERPRO

Annotation Cluster 31

Category

GOTERM\_CC\_FAT

GOTERM\_CC\_FAT

GOTERM\_CC\_FAT

Annotation Cluster 32

Category

PIR\_SUPERFAMILY

UP\_SEQ\_FEATURE

INTERPRO

Annotation Cluster 33

Category

INTERPRO

SP\_PIR\_KEYWORDS  
GOTERM\_MF\_FAT  
INTERPRO  
PIR\_SUPERFAMILY

Annotation Cluster 34

Category  
GOTERM\_BP\_FAT  
GOTERM\_BP\_FAT  
GOTERM\_BP\_FAT  
GOTERM\_BP\_FAT

Annotation Cluster 35

Category  
GOTERM\_BP\_FAT  
GOTERM\_MF\_FAT  
GOTERM\_MF\_FAT

Enrichment Score: 16.481688970685838

Term

region of interest:Linker 12  
region of interest:Coil 2  
region of interest:Linker 1  
region of interest:Coil 1B  
region of interest:Coil 1A  
region of interest:Rod  
region of interest:Head  
Intermediate filament  
region of interest:Tail  
IPR016044:Filament  
IPR018039:Intermediate filament protein, conserved site  
PIRSF002282:cytoskeletal keratin  
IPR001664:Intermediate filament protein  
IPR003054:Type II keratin  
GO:0005198~structural molecule activity  
site:Stutter  
keratin  
GO:0005882~intermediate filament  
GO:0045095~keratin filament  
GO:0045111~intermediate filament cytoskeleton  
IPR002957:Keratin, type I

Enrichment Score: 14.207278284320084

Term

GO:0007398~ectoderm development  
GO:0008544~epidermis development  
keratinization  
GO:0031424~keratinization  
GO:0030216~keratinocyte differentiation  
GO:0009913~epidermal cell differentiation  
IPR003267:Small proline-rich  
GO:0030855~epithelial cell differentiation  
GO:0060429~epithelium development  
GO:0001533~cornified envelope

Enrichment Score: 7.4691752796059445

Term

ribonucleoprotein  
GO:0030529~ribonucleoprotein complex  
ribosomal protein  
GO:0003735~structural constituent of ribosome  
GO:0005840~ribosome  
GO:0000313~organellar ribosome  
GO:0005761~mitochondrial ribosome

GO:0006412~translation  
GO:0033279~ribosomal subunit  
GO:0015935~small ribosomal subunit  
GO:0000314~organellar small ribosomal subunit  
GO:0005763~mitochondrial small ribosomal subunit

Enrichment Score: 6.406599892920229

Term

GO:0030529~ribonucleoprotein complex  
GO:0006396~RNA processing  
GO:0003723~RNA binding

Enrichment Score: 5.102192781675423

Term

hsa03050:Proteasome  
proteasome  
GO:0000502~proteasome complex  
GO:0031145~anaphase-promoting complex-dependent proteasomal ubiquitin  
GO:0051436~negative regulation of ubiquitin-protein ligase activity  
GO:0051444~negative regulation of ubiquitin-protein ligase activity  
GO:0051352~negative regulation of ligase activity  
IPR001353:Proteasome, subunit alpha/beta  
GO:0051437~positive regulation of ubiquitin-protein ligase activity  
threonine protease  
GO:0051443~positive regulation of ubiquitin-protein ligase activity  
GO:0070003~threonine-type peptidase activity  
GO:0004298~threonine-type endopeptidase activity  
GO:0051439~regulation of ubiquitin-protein ligase activity during mi  
proteinase  
GO:0051351~positive regulation of ligase activity  
GO:0005839~proteasome core complex  
GO:0031397~negative regulation of protein ubiquitination  
GO:0031398~positive regulation of protein ubiquitination  
GO:0051438~regulation of ubiquitin-protein ligase activity  
GO:0051340~regulation of ligase activity  
GO:0031396~regulation of protein ubiquitination  
IPR001353:Proteasome, alpha and beta subunits  
GO:0043161~proteasomal ubiquitin-dependent protein catabolic process  
GO:0010498~proteasomal protein catabolic process  
IPR016050:Proteasome, beta-type subunit, conserved site  
GO:0000278~mitotic cell cycle  
GO:0031400~negative regulation of protein modification process  
protein degradation  
IPR000426:Proteasome, alpha-subunit, conserved site  
GO:0051248~negative regulation of protein metabolic process  
GO:0022402~cell cycle process  
GO:0031401~positive regulation of protein modification process  
GO:0032269~negative regulation of cellular protein metabolic process

GO:0007049~cell cycle  
GO:0044092~negative regulation of molecular function  
GO:0043086~negative regulation of catalytic activity  
GO:0006511~ubiquitin-dependent protein catabolic process  
GO:0010605~negative regulation of macromolecule metabolic process  
GO:0032270~positive regulation of cellular protein metabolic process  
GO:0031399~regulation of protein modification process

Enrichment Score: 4.462221191827637

Term

IPR013787:S100/CaBP-9k-type, calcium binding, subdomain  
IPR001751:S100/CaBP-9k-type, calcium binding  
calcium-binding region:2; high affinity  
PIRSF002353:S-100 protein  
calcium-binding region:1; low affinity  
EF hand  
domain:EF-hand 2  
domain:EF-hand 1  
IPR011992:EF-Hand type  
IPR018248:EF hand  
IPR018249:EF-HAND 2  
IPR018247:EF-HAND 1

Enrichment Score: 4.187211849721411

Term

h\_smPathway:Spliceosomal Assembly  
hsa03040:Spliceosome  
SM00651:Sm  
mrna splicing  
IPR006649:Like-Sm ribonucleoprotein, eukaryotic and archaea-type, co  
IPR001163:Like-Sm ribonucleoprotein, core  
GO:0030532~small nuclear ribonucleoprotein complex  
mrna processing  
GO:0008380~RNA splicing  
GO:0006396~RNA processing  
Spliceosome  
GO:0006397~mRNA processing  
GO:0005681~spliceosome  
GO:0000375~RNA splicing, via transesterification reactions  
GO:0000377~RNA splicing, via transesterification reactions with bulg  
GO:0000398~nuclear mRNA splicing, via spliceosome  
GO:0016071~mRNA metabolic process  
rna-binding  
GO:0000387~spliceosomal snRNP biogenesis

Enrichment Score: 4.0753555027506945

Term

IPR018363:CD59 antigen, conserved site

SM00134:LU  
domain:UPAR/Ly6  
IPR016054:Ly-6 antigen / uPA receptor -like  
IPR001526:CD59 antigen  
PIRSF002021:Ly-6-like protein  
gpi-anchor

Enrichment Score: 3.3705598797631997

Term

IPR018069:Whey acidic protein, 4-disulphide core, conserved site  
GO:0004867~serine-type endopeptidase inhibitor activity  
SM00217:WAP  
GO:0030414~peptidase inhibitor activity  
IPR008197:Whey acidic protein, 4-disulphide core  
Serine protease inhibitor  
GO:0004866~endopeptidase inhibitor activity  
protease inhibitor  
IPR015874:4-disulphide core  
site:Reactive bond  
domain:WAP  
GO:0004857~enzyme inhibitor activity  
SM00093:SERPIN  
PIRSF001630:serpin  
IPR000215:Protease inhibitor I4, serpin  
domain:WAP 1  
domain:WAP 2

Enrichment Score: 3.2924412815974016

Term

SM00020:Tryp\_SPc  
Serine protease  
domain:Peptidase S1  
IPR001314:Peptidase S1A, chymotrypsin  
IPR018114:Peptidase S1/S6, chymotrypsin/Hap, active site  
GO:0004252~serine-type endopeptidase activity  
IPR001254:Peptidase S1 and S6, chymotrypsin/Hap  
GO:0008236~serine-type peptidase activity  
active site:Charge relay system  
GO:0017171~serine hydrolase activity  
GO:0004175~endopeptidase activity  
GO:0008233~peptidase activity  
Protease  
GO:0070011~peptidase activity, acting on L-amino acid peptides

Enrichment Score: 2.7498696018301723

Term

Secreted  
signal

GO:0005576~extracellular region

Enrichment Score: 2.6645404281912803

Term

tumor antigen

domain:MAGE

IPR002190:MAGE protein

Enrichment Score: 2.5720541786430298

Term

GO:0070013~intracellular organelle lumen

GO:0031974~membrane-enclosed lumen

GO:0043233~organelle lumen

GO:0005730~nucleolus

GO:0031981~nuclear lumen

Enrichment Score: 2.419260644222206

Term

IPR017936:Thioredoxin-like

IPR006662:Thioredoxin-like subdomain

redox-active disulfide

Redox-active center

IPR017937:Thioredoxin, conserved site

domain:Thioredoxin 2

domain:Thioredoxin 1

GO:0016864~intramolecular oxidoreductase activity, transposing S-S b

GO:0003756~protein disulfide isomerase activity

GO:0016860~intramolecular oxidoreductase activity

GO:0016862~intramolecular oxidoreductase activity, interconverting k

GO:0045454~cell redox homeostasis

IPR005788:Disulphide isomerase

site:Contributes to redox potential value

PIRSF001487:protein disulfide-isomerase

IPR012335:Thioredoxin fold

site:Lowers pKa of C-terminal Cys of second active site

site:Lowers pKa of C-terminal Cys of first active site

IPR005792:Protein disulphide isomerase

GO:0005788~endoplasmic reticulum lumen

IPR013766:Thioredoxin domain

intramolecular oxidoreductase

Enrichment Score: 2.379794611005659

Term

tricarboxylic acid cycle

GO:0009060~aerobic respiration

GO:0045333~cellular respiration

hsa00020:Citrate cycle (TCA cycle)

GO:0006099~tricarboxylic acid cycle

GO:0046356~acetyl-CoA catabolic process  
GO:0006084~acetyl-CoA metabolic process  
GO:0051187~cofactor catabolic process  
GO:0009109~coenzyme catabolic process  
GO:0015980~energy derivation by oxidation of organic compounds  
GO:0000104~succinate dehydrogenase activity

Enrichment Score: 2.3764889467219867

Term

mitochondrion  
GO:0044429~mitochondrial part  
transit peptide  
hsa05012:Parkinson's disease  
transit peptide:Mitochondrion  
GO:0005759~mitochondrial matrix  
GO:0031980~mitochondrial lumen  
GO:0045333~cellular respiration  
GO:0005739~mitochondrion  
GO:0031967~organelle envelope  
GO:0031975~envelope  
mitochondrion inner membrane  
GO:0031966~mitochondrial membrane  
GO:0005740~mitochondrial envelope  
GO:0044455~mitochondrial membrane part  
GO:0015980~energy derivation by oxidation of organic compounds  
electron transport  
hsa05016:Huntington's disease  
GO:0019866~organelle inner membrane  
GO:0022904~respiratory electron transport chain  
GO:0005746~mitochondrial respiratory chain  
GO:0070469~respiratory chain  
GO:0005743~mitochondrial inner membrane  
respiratory chain  
GO:0042775~mitochondrial ATP synthesis coupled electron transport  
GO:0042773~ATP synthesis coupled electron transport  
hsa00190:Oxidative phosphorylation  
GO:0006091~generation of precursor metabolites and energy  
GO:0016655~oxidoreductase activity, acting on NADH or NADPH, quinone  
GO:0022900~electron transport chain

Enrichment Score: 2.3304572277620172

Term

IPR003008:Tubulin/FtsZ, GTPase domain  
IPR018316:Tubulin/FtsZ, 2-layer sandwich domain  
IPR017975:Tubulin, conserved site  
IPR000217:Tubulin  
PIRSF002306:tubulin  
GO:0051258~protein polymerization



IPR002452:Alpha tubulin  
GO:0043623~cellular protein complex assembly

Enrichment Score: 2.259829326076668

Term

GO:0015293~symporter activity  
Symport  
GO:0015370~solute:sodium symporter activity  
GO:0015294~solute:cation symporter activity  
GO:0005326~neurotransmitter transporter activity  
GO:0005328~neurotransmitter:sodium symporter activity  
IPR000175:Sodium:neurotransmitter symporter

Enrichment Score: 2.1646931511556664

Term

GO:0046870~cadmium ion binding  
metal ion-binding site:Divalent metal cation; cluster B  
metal ion-binding site:Divalent metal cation; cluster A  
IPR018064:Metallothionein, vertebrate, metal binding site  
metal-thiolate cluster  
metal binding  
IPR003019:Metallothionein superfamily, eukaryotic  
IPR000006:Metallothionein, vertebrate  
PIRSF002564:metallothionein  
copper  
chelation  
cadmium  
region of interest:Beta  
region of interest:Alpha

Enrichment Score: 2.148913924442017

Term

SM00097:WNT1  
IPR005817:Wnt superfamily  
IPR005816:Secreted growth factor Wnt protein  
IPR018161:Secreted growth factor Wnt protein, conserved site  
PIRSF001784:int-1 transforming protein  
GO:0007223~Wnt receptor signaling pathway, calcium modulating pathway

Enrichment Score: 2.146428276323983

Term

GO:0022404~molting cycle process  
GO:0001942~hair follicle development  
GO:0022405~hair cycle process  
GO:0042633~hair cycle  
GO:0042303~molting cycle

Enrichment Score: 2.08993132746172

Term

hsa00030:Pentose phosphate pathway  
GO:0016052~carbohydrate catabolic process  
GO:0006007~glucose catabolic process  
GO:0019748~secondary metabolic process  
GO:0046365~monosaccharide catabolic process  
GO:0044275~cellular carbohydrate catabolic process  
GO:0046496~nicotinamide nucleotide metabolic process  
GO:0006769~nicotinamide metabolic process  
GO:0009820~alkaloid metabolic process  
GO:0019320~hexose catabolic process  
GO:0019362~pyridine nucleotide metabolic process  
GO:0006006~glucose metabolic process  
GO:0046164~alcohol catabolic process  
pentose shunt  
GO:0006098~pentose-phosphate shunt  
GO:0006739~NADP metabolic process  
GO:0019318~hexose metabolic process  
GO:0006733~oxidoreduction coenzyme metabolic process  
GO:0019321~pentose metabolic process  
GO:0043603~cellular amide metabolic process  
GO:0006096~glycolysis  
GO:0005996~monosaccharide metabolic process

Enrichment Score: 2.0122183380477385

Term

region of interest:MHC class I alpha-2 like  
region of interest:MHC class I alpha-1 like  
PIRSF037807:retinoic acid early inducible protein 1

Enrichment Score: 2.00986841033491

Term

h\_ranPathway:Cycling of Ran in nucleocytoplasmic transport  
h\_npcPathway:Mechanism of Protein Import into the Nucleus  
h\_ranMSpathway:Role of Ran in mitotic spindle regulation

Enrichment Score: 1.8479790211462275

Term

GO:0016866~intramolecular transferase activity  
GO:0001522~pseudouridine synthesis  
GO:0009982~pseudouridine synthase activity

Enrichment Score: 1.8424748512622717

Term

mitochondrion outer membrane  
GO:0005741~mitochondrial outer membrane  
GO:0031968~organelle outer membrane  
GO:0019867~outer membrane

Enrichment Score: 1.7868766291085558

Term

SM00212:UBCc

IPR000608:Ubiquitin-conjugating enzyme, E2

IPR016135:Ubiquitin-conjugating enzyme/RWD-like

Enrichment Score: 1.7725296285956527

Term

IPR003879:Butyrophysin-like

SM00336:BBOX

zinc finger region:B box-type

zinc finger region:RING-type

domain:B30.2/SPRY

SM00589:PRY

IPR000315:Zinc finger, B-box

IPR001870:B302 (SPRY)-like

PIRSF001733:tripartite motif-containing protein

IPR006574:SPRY-associated

IPR003877:SPla/Ryanodine receptor SPRY

Enrichment Score: 1.7617183849028941

Term

IPR001125:Recoverin

Signal transduction mechanisms / Cytoskeleton / Cell division and ch

IPR018248:EF hand

Enrichment Score: 1.7250058816775624

Term

IPR000566:Lipocalin-related protein and Bos/Can/Equ allergen

IPR012674:Calycin

IPR002345:Lipocalin

Enrichment Score: 1.6898436338801728

Term

GO:0015934~large ribosomal subunit

GO:0000315~organellar large ribosomal subunit

GO:0005762~mitochondrial large ribosomal subunit

Enrichment Score: 1.6308236999321186

Term

PIRSF001467:peptidylprolyl isomerase

domain:PPIase cyclophilin-type

IPR002130:Peptidyl-prolyl cis-trans isomerase, cyclophilin-type

Enrichment Score: 1.6245617340384846

Term

IPR000866:Alkyl hydroperoxide reductase/ Thiol specific antioxidant/

antioxidant

GO:0016209~antioxidant activity

IPR019479:Peroxiredoxin, C-terminal

PIRSF000239:alkyl hydroperoxide reductase C22 protein

Enrichment Score: 1.5736127165604337

Term

GO:0022613~ribonucleoprotein complex biogenesis

GO:0034660~ncRNA metabolic process

GO:0042254~ribosome biogenesis

GO:0006364~rRNA processing

Enrichment Score: 1.5339722611672193

Term

GO:0000041~transition metal ion transport

GO:0046915~transition metal ion transmembrane transporter activity

GO:0005385~zinc ion transmembrane transporter activity

| Count | %         | PValue    |
|-------|-----------|-----------|
| 34    | 2.7664768 | 4.0201259 |
| 34    | 2.7664768 | 4.0201259 |
| 35    | 2.8478437 | 1.1053562 |
| 35    | 2.8478437 | 1.1053562 |
| 35    | 2.8478437 | 1.1053562 |
| 35    | 2.8478437 | 1.9906582 |
| 35    | 2.8478437 | 6.2183468 |
| 35    | 2.8478437 | 7.6055862 |
| 34    | 2.7664768 | 2.2874038 |
| 33    | 2.6851098 | 1.8927981 |
| 33    | 2.6851098 | 1.8927981 |
| 32    | 2.6037428 | 2.0352980 |
| 32    | 2.6037428 | 3.5097657 |
| 19    | 1.5459723 | 3.1533749 |
| 96    | 7.8112286 | 1.1976644 |
| 19    | 1.5459723 | 9.1772368 |
| 33    | 2.6851098 | 2.5771274 |
| 37    | 3.0105777 | 1.7016427 |
| 24    | 1.9528071 | 2.9095418 |
| 37    | 3.0105777 | 3.0626252 |
| 12    | 0.9764035 | 4.7047659 |

| Count | %         | PValue    |
|-------|-----------|-----------|
| 60    | 4.8820179 | 5.1121634 |
| 56    | 4.5565500 | 1.0030547 |
| 23    | 1.8714401 | 1.0611751 |
| 24    | 1.9528071 | 2.8341785 |
| 29    | 2.3596419 | 3.8295508 |
| 30    | 2.4410089 | 7.1734982 |
| 17    | 1.3832384 | 1.2522632 |
| 35    | 2.8478437 | 2.3996869 |
| 40    | 3.2546786 | 7.3200851 |
| 11    | 0.8950366 | 9.0746166 |

| Count | %         | PValue    |
|-------|-----------|-----------|
| 60    | 4.8820179 | 6.5395016 |
| 84    | 6.8348250 | 8.1045582 |
| 39    | 3.1733116 | 1.0960461 |
| 36    | 2.9292107 | 7.3286800 |
| 41    | 3.3360455 | 1.4460394 |
| 17    | 1.3832384 | 9.4218720 |
| 17    | 1.3832384 | 9.4218720 |

|    |           |           |
|----|-----------|-----------|
| 47 | 3.8242473 | 2.9430617 |
| 26 | 2.1155410 | 2.9616376 |
| 14 | 1.1391375 | 3.9894873 |
| 7  | 0.5695687 | 0.0011105 |
| 7  | 0.5695687 | 0.0011105 |

| Count | %         | PValue    |
|-------|-----------|-----------|
| 84    | 6.8348250 | 8.1045582 |
| 62    | 5.0447518 | 9.1762050 |
| 70    | 5.6956875 | 8.1060235 |

| Count | %         | PValue    |
|-------|-----------|-----------|
| 20    | 1.6273393 | 1.5442547 |
| 20    | 1.6273393 | 5.6787879 |
| 20    | 1.6273393 | 2.0945893 |
| 20    | 1.6273393 | 3.5639020 |
| 20    | 1.6273393 | 3.5639020 |
| 20    | 1.6273393 | 6.1305875 |
| 20    | 1.6273393 | 6.1305875 |
| 11    | 0.8950366 | 7.6647842 |
| 20    | 1.6273393 | 7.9702204 |
| 11    | 0.8950366 | 9.4411086 |
| 20    | 1.6273393 | 1.3249589 |
| 11    | 0.8950366 | 1.4196293 |
| 11    | 0.8950366 | 1.4196293 |
| 20    | 1.6273393 | 1.6948343 |
| 10    | 0.8136696 | 2.2492498 |
| 20    | 1.6273393 | 2.7319164 |
| 11    | 0.8950366 | 2.9562457 |
| 20    | 1.6273393 | 3.4436667 |
| 21    | 1.7087062 | 6.3699101 |
| 20    | 1.6273393 | 8.3162608 |
| 20    | 1.6273393 | 1.5431373 |
| 21    | 1.7087062 | 1.1207663 |
| 8     | 0.6509357 | 1.1776982 |
| 21    | 1.7087062 | 1.5262168 |
| 21    | 1.7087062 | 1.5262168 |
| 7     | 0.5695687 | 5.1832805 |
| 46    | 3.7428803 | 1.0874023 |
| 21    | 1.7087062 | 1.4943022 |
| 7     | 0.5695687 | 8.0486743 |
| 5     | 0.4068348 | 0.0010453 |
| 25    | 2.0341741 | 0.0020469 |
| 57    | 4.6379170 | 0.0029668 |
| 24    | 1.9528071 | 0.0043039 |
| 23    | 1.8714401 | 0.0055621 |

|    |           |           |
|----|-----------|-----------|
| 72 | 5.8584214 | 0.0065072 |
| 36 | 2.9292107 | 0.0074546 |
| 30 | 2.4410089 | 0.0140543 |
| 26 | 2.1155410 | 0.0248764 |
| 63 | 5.1261187 | 0.0456692 |
| 24 | 1.9528071 | 0.0473336 |
| 29 | 2.3596419 | 0.0475166 |

| Count | %         | PValue    |
|-------|-----------|-----------|
| 14    | 1.1391375 | 3.3234591 |
| 14    | 1.1391375 | 5.8312106 |
| 12    | 0.9764035 | 1.1728419 |
| 12    | 0.9764035 | 1.8406431 |
| 10    | 0.8136696 | 4.4198212 |
| 13    | 1.0577705 | 2.9774970 |
| 23    | 1.8714401 | 0.0025335 |
| 22    | 1.7900732 | 0.0054016 |
| 25    | 2.0341741 | 0.0220088 |
| 16    | 1.3018714 | 0.0234620 |
| 23    | 1.8714401 | 0.0258092 |
| 23    | 1.8714401 | 0.0282834 |

| Count | %         | PValue    |
|-------|-----------|-----------|
| 10    | 0.8136696 | 4.9465042 |
| 25    | 2.0341741 | 8.7207000 |
| 9     | 0.7323026 | 1.5206364 |
| 33    | 2.6851098 | 2.5163213 |
| 9     | 0.7323026 | 4.8038702 |
| 9     | 0.7323026 | 1.3265708 |
| 10    | 0.8136696 | 2.1658071 |
| 35    | 2.8478437 | 3.9393400 |
| 39    | 3.1733116 | 4.9395585 |
| 62    | 5.0447518 | 9.1762050 |
| 20    | 1.6273393 | 1.6871967 |
| 40    | 3.2546786 | 3.1351801 |
| 22    | 1.7900732 | 3.8592427 |
| 23    | 1.8714401 | 6.9547685 |
| 23    | 1.8714401 | 6.9547685 |
| 23    | 1.8714401 | 6.9547685 |
| 41    | 3.3360455 | 0.0025434 |
| 51    | 4.1497152 | 0.0038205 |
| 7     | 0.5695687 | 0.0102163 |

| Count | %         | PValue    |
|-------|-----------|-----------|
| 10    | 0.8136696 | 5.0082115 |

|    |           |           |
|----|-----------|-----------|
| 8  | 0.6509357 | 1.2916716 |
| 9  | 0.7323026 | 1.5510537 |
| 8  | 0.6509357 | 3.4930076 |
| 8  | 0.6509357 | 8.6480757 |
| 5  | 0.4068348 | 0.0017789 |
| 17 | 1.3832384 | 0.0055049 |

| Count | %         | PValue    |
|-------|-----------|-----------|
| 8     | 0.6509357 | 6.2430830 |
| 20    | 1.6273393 | 6.5056014 |
| 8     | 0.6509357 | 7.6361075 |
| 26    | 2.1155410 | 1.9870911 |
| 8     | 0.6509357 | 2.0828872 |
| 17    | 1.3832384 | 3.1067505 |
| 24    | 1.9528071 | 6.7944843 |
| 19    | 1.5459723 | 1.1269227 |
| 5     | 0.4068348 | 0.0010453 |
| 10    | 0.8136696 | 0.0017207 |
| 5     | 0.4068348 | 0.0024274 |
| 31    | 2.5223759 | 0.0032096 |
| 8     | 0.6509357 | 0.0064648 |
| 8     | 0.6509357 | 0.0103774 |
| 8     | 0.6509357 | 0.0143083 |
| 3     | 0.2441008 | 0.0349488 |
| 3     | 0.2441008 | 0.0349488 |

| Count | %         | PValue    |
|-------|-----------|-----------|
| 20    | 1.6273393 | 2.3951210 |
| 23    | 1.8714401 | 3.8250911 |
| 19    | 1.5459723 | 1.0553912 |
| 19    | 1.5459723 | 1.3598527 |
| 19    | 1.5459723 | 1.5422651 |
| 24    | 1.9528071 | 1.7322301 |
| 20    | 1.6273393 | 1.9029479 |
| 25    | 2.0341741 | 5.9900052 |
| 26    | 2.1155410 | 6.1665616 |
| 25    | 2.0341741 | 7.0453541 |
| 42    | 3.4174125 | 8.7100951 |
| 53    | 4.3124491 | 0.0107492 |
| 44    | 3.5801464 | 0.0139627 |
| 48    | 3.9056143 | 0.0354005 |

| Count | %         | PValue    |
|-------|-----------|-----------|
| 153   | 12.449145 | 2.7037436 |
| 227   | 18.470301 | 0.0441578 |



162 13.181448 0.0471430

| Count | %         | PValue    |
|-------|-----------|-----------|
| 10    | 0.8136696 | 4.5502629 |
| 8     | 0.6509357 | 0.0032518 |
| 8     | 0.6509357 | 0.0068581 |

| Count | %         | PValue    |
|-------|-----------|-----------|
| 163   | 13.262815 | 3.3865876 |
| 168   | 13.669650 | 4.6292119 |
| 165   | 13.425549 | 4.9696877 |
| 63    | 5.1261187 | 0.0384481 |
| 120   | 9.7640358 | 0.0460527 |

| Count | %         | PValue    |
|-------|-----------|-----------|
| 11    | 0.8950366 | 7.5451380 |
| 6     | 0.4882017 | 2.3081260 |
| 5     | 0.4068348 | 8.8032724 |
| 10    | 0.8136696 | 9.9266924 |
| 8     | 0.6509357 | 0.0011243 |
| 5     | 0.4068348 | 0.0015326 |
| 5     | 0.4068348 | 0.0015326 |
| 5     | 0.4068348 | 0.0017771 |
| 5     | 0.4068348 | 0.0017771 |
| 9     | 0.7323026 | 0.0027891 |
| 5     | 0.4068348 | 0.0028089 |
| 12    | 0.9764035 | 0.0032730 |
| 4     | 0.3254678 | 0.0048598 |
| 4     | 0.3254678 | 0.0072194 |
| 4     | 0.3254678 | 0.0119965 |
| 14    | 1.1391375 | 0.0147966 |
| 3     | 0.2441008 | 0.0218773 |
| 3     | 0.2441008 | 0.0218773 |
| 3     | 0.2441008 | 0.0236490 |
| 12    | 0.9764035 | 0.0252255 |
| 6     | 0.4882017 | 0.0291602 |
| 4     | 0.3254678 | 0.0353871 |

| Count | %         | PValue    |
|-------|-----------|-----------|
| 7     | 0.5695687 | 0.0014446 |
| 9     | 0.7323026 | 0.0020489 |
| 16    | 1.3018714 | 0.0022939 |
| 8     | 0.6509357 | 0.0027753 |
| 7     | 0.5695687 | 0.0036636 |

|    |           |           |
|----|-----------|-----------|
| 7  | 0.5695687 | 0.0036636 |
| 8  | 0.6509357 | 0.0041611 |
| 8  | 0.6509357 | 0.0041611 |
| 7  | 0.5695687 | 0.0070132 |
| 19 | 1.5459723 | 0.0091571 |
| 3  | 0.2441008 | 0.0236127 |

| Count | %         | PValue    |
|-------|-----------|-----------|
| 89    | 7.2416598 | 9.2991509 |
| 69    | 5.6143205 | 5.7138697 |
| 52    | 4.2310821 | 1.3223490 |
| 20    | 1.6273393 | 4.1308413 |
| 49    | 3.9869812 | 5.8607388 |
| 31    | 2.5223759 | 7.0103118 |
| 31    | 2.5223759 | 7.0103118 |
| 16    | 1.3018714 | 0.0022939 |
| 102   | 8.2994304 | 0.0026603 |
| 63    | 5.1261187 | 0.0036575 |
| 63    | 5.1261187 | 0.0039414 |
| 23    | 1.8714401 | 0.0049002 |
| 43    | 3.4987794 | 0.0052869 |
| 45    | 3.6615134 | 0.0056507 |
| 18    | 1.4646053 | 0.0070928 |
| 19    | 1.5459723 | 0.0091571 |
| 14    | 1.1391375 | 0.0096397 |
| 21    | 1.7087062 | 0.0099410 |
| 36    | 2.9292107 | 0.0105682 |
| 11    | 0.8950366 | 0.0109076 |
| 11    | 0.8950366 | 0.0140875 |
| 12    | 0.9764035 | 0.0162224 |
| 32    | 2.6037428 | 0.0286583 |
| 10    | 0.8136696 | 0.0329187 |
| 9     | 0.7323026 | 0.0351617 |
| 9     | 0.7323026 | 0.0351617 |
| 15    | 1.2205044 | 0.0360202 |
| 31    | 2.5223759 | 0.0370731 |
| 8     | 0.6509357 | 0.0395196 |
| 14    | 1.1391375 | 0.0466898 |

| Count | %         | PValue    |
|-------|-----------|-----------|
| 8     | 0.6509357 | 6.6404140 |
| 7     | 0.5695687 | 0.0023706 |
| 7     | 0.5695687 | 0.0030314 |
| 7     | 0.5695687 | 0.0038205 |
| 7     | 0.5695687 | 0.0047940 |
| 10    | 0.8136696 | 0.0053321 |

4 0.3254678 0.0175860  
19 1.5459723 0.0277160

| Count | %         | PValue    |
|-------|-----------|-----------|
| 21    | 1.7087062 | 6.0599696 |
| 17    | 1.3832384 | 0.0015117 |
| 11    | 0.8950366 | 0.0017834 |
| 15    | 1.2205044 | 0.0034919 |
| 6     | 0.4882017 | 0.0179785 |
| 5     | 0.4068348 | 0.0384099 |
| 5     | 0.4068348 | 0.0385224 |

| Count | %         | PValue    |
|-------|-----------|-----------|
| 5     | 0.4068348 | 0.0028089 |
| 5     | 0.4068348 | 0.0036253 |
| 5     | 0.4068348 | 0.0036253 |
| 5     | 0.4068348 | 0.0042017 |
| 5     | 0.4068348 | 0.0050825 |
| 6     | 0.4882017 | 0.0053507 |
| 5     | 0.4068348 | 0.0059780 |
| 5     | 0.4068348 | 0.0059780 |
| 5     | 0.4068348 | 0.0069796 |
| 10    | 0.8136696 | 0.0086320 |
| 4     | 0.3254678 | 0.0108716 |
| 4     | 0.3254678 | 0.0108716 |
| 4     | 0.3254678 | 0.0214651 |
| 4     | 0.3254678 | 0.0214651 |

| Count | %         | PValue    |
|-------|-----------|-----------|
| 6     | 0.4882017 | 0.0033887 |
| 6     | 0.4882017 | 0.0064827 |
| 6     | 0.4882017 | 0.0064827 |
| 6     | 0.4882017 | 0.0064827 |
| 6     | 0.4882017 | 0.0116516 |
| 6     | 0.4882017 | 0.0118798 |

| Count | %         | PValue    |
|-------|-----------|-----------|
| 9     | 0.7323026 | 0.0067336 |
| 9     | 0.7323026 | 0.0067336 |
| 9     | 0.7323026 | 0.0067336 |
| 9     | 0.7323026 | 0.0077902 |
| 9     | 0.7323026 | 0.0077902 |

| Count | %         | PValue    |
|-------|-----------|-----------|
| 8     | 0.6509357 | 7.0641951 |
| 18    | 1.4646053 | 0.0010979 |
| 12    | 0.9764035 | 0.0016516 |
| 14    | 1.1391375 | 0.0025082 |
| 13    | 1.0577705 | 0.0028814 |
| 14    | 1.1391375 | 0.0048173 |
| 9     | 0.7323026 | 0.0049489 |
| 9     | 0.7323026 | 0.0049489 |
| 9     | 0.7323026 | 0.0057891 |
| 12    | 0.9764035 | 0.0066843 |
| 9     | 0.7323026 | 0.0067336 |
| 20    | 1.6273393 | 0.0080882 |
| 13    | 1.0577705 | 0.0085359 |
| 3     | 0.2441008 | 0.0113105 |
| 4     | 0.3254678 | 0.0194837 |
| 5     | 0.4068348 | 0.0202308 |
| 22    | 1.7900732 | 0.0216581 |
| 9     | 0.7323026 | 0.0236114 |
| 4     | 0.3254678 | 0.0345541 |
| 9     | 0.7323026 | 0.0351617 |
| 8     | 0.6509357 | 0.0388002 |
| 23    | 1.8714401 | 0.0497476 |

| Count | %         | PValue    |
|-------|-----------|-----------|
| 4     | 0.3254678 | 0.0043275 |
| 4     | 0.3254678 | 0.0043275 |
| 3     | 0.2441008 | 0.0490750 |

| Count | %         | PValue    |
|-------|-----------|-----------|
| 4     | 0.3254678 | 0.0045523 |
| 5     | 0.4068348 | 0.0054468 |
| 4     | 0.3254678 | 0.0376715 |

| Count | %         | PValue    |
|-------|-----------|-----------|
| 7     | 0.5695687 | 0.0058083 |
| 5     | 0.4068348 | 0.0124059 |
| 4     | 0.3254678 | 0.0396622 |

| Count | %         | PValue    |
|-------|-----------|-----------|
| 13    | 1.0577705 | 0.0012697 |
| 13    | 1.0577705 | 0.0248527 |
| 14    | 1.1391375 | 0.0322224 |
| 14    | 1.1391375 | 0.0419627 |

| Count | %         | PValue    |
|-------|-----------|-----------|
| 8     | 0.6509357 | 0.0074260 |
| 8     | 0.6509357 | 0.0163041 |
| 8     | 0.6509357 | 0.0360008 |

| Count | %         | PValue    |
|-------|-----------|-----------|
| 11    | 0.8950366 | 0.0067726 |
| 11    | 0.8950366 | 0.0069062 |
| 10    | 0.8136696 | 0.0070277 |
| 23    | 1.8714401 | 0.0134109 |
| 12    | 0.9764035 | 0.0136552 |
| 8     | 0.6509357 | 0.0173330 |
| 11    | 0.8950366 | 0.0187638 |
| 12    | 0.9764035 | 0.0267767 |
| 5     | 0.4068348 | 0.0350344 |
| 8     | 0.6509357 | 0.0360008 |
| 11    | 0.8950366 | 0.0480658 |

| Count | %         | PValue    |
|-------|-----------|-----------|
| 6     | 0.4882017 | 0.0124658 |
| 7     | 0.5695687 | 0.0177319 |
| 16    | 1.3018714 | 0.0234620 |

| Count | %         | PValue    |
|-------|-----------|-----------|
| 7     | 0.5695687 | 0.0164440 |
| 7     | 0.5695687 | 0.0190128 |
| 6     | 0.4882017 | 0.0213760 |

| Count | %         | PValue    |
|-------|-----------|-----------|
| 12    | 0.9764035 | 0.0071095 |
| 5     | 0.4068348 | 0.0346188 |
| 5     | 0.4068348 | 0.0346188 |

| Count | %         | PValue    |
|-------|-----------|-----------|
| 4     | 0.3254678 | 0.0119965 |
| 5     | 0.4068348 | 0.0236265 |
| 5     | 0.4068348 | 0.0451932 |

| Count | %         | PValue    |
|-------|-----------|-----------|
| 4     | 0.3254678 | 0.0080911 |

|   |           |           |
|---|-----------|-----------|
| 4 | 0.3254678 | 0.0155544 |
| 8 | 0.6509357 | 0.0323583 |
| 3 | 0.2441008 | 0.0377119 |
| 3 | 0.2441008 | 0.0490750 |

| Count | %         | PValue    |
|-------|-----------|-----------|
| 22    | 1.7900732 | 0.0111100 |
| 25    | 2.0341741 | 0.0247820 |
| 15    | 1.2205044 | 0.0382729 |
| 12    | 0.9764035 | 0.0481730 |

| Count | %         | PValue    |
|-------|-----------|-----------|
| 11    | 0.8950366 | 0.0217048 |
| 6     | 0.4882017 | 0.0290502 |
| 4     | 0.3254678 | 0.0396622 |

| Genes                                                        | List | Tota |
|--------------------------------------------------------------|------|------|
| KRT6C, KRT6A, KRT6B, KRT23, KRT33B, KRT81, KRT9, KRT25, KRT1 |      | 1206 |
| KRT6C, KRT6A, KRT6B, LMNB2, KRT23, KRT33B, KRT81, KRT9, KRT1 |      | 1206 |
| KRT6C, KRT6A, KRT6B, LMNB2, KRT23, KRT33B, KRT81, KRT9, KRT1 |      | 1206 |
| KRT6C, KRT6A, KRT6B, LMNB2, KRT23, KRT33B, KRT81, KRT9, KRT1 |      | 1206 |
| KRT6C, KRT6A, KRT6B, LMNB2, KRT23, KRT33B, KRT81, KRT9, KRT1 |      | 1206 |
| KRT6C, KRT6A, KRT6B, LMNB2, KRT23, KRT33B, KRT81, KRT9, KRT1 |      | 1206 |
| KRT6C, KRT6A, KRT6B, LMNB2, KRT23, KRT33B, KRT81, KRT9, KRT1 |      | 1206 |
| KRT6C, KRT6A, KRT6B, LMNB2, KRT23, KRT33B, KRT81, KRT9, KRT1 |      | 1208 |
| KRT6C, KRT6A, KRT6B, LMNB2, KRT33B, KRT81, KRT9, KRT25, KRT1 |      | 1206 |
| KRT6C, KRT6A, LMNB2, KRT23, KRT33B, KRT81, KRT9, KRT25, KRT1 |      | 1095 |
| KRT6C, KRT6A, LMNB2, KRT23, KRT33B, KRT81, KRT9, KRT25, KRT1 |      | 1095 |
| KRT6C, KRT6A, KRT6B, LMNB2, KRT23, KRT81, KRT9, KRT25, KRT2  |      | 561  |
| KRT6C, KRT6A, LMNB2, KRT23, KRT33B, KRT81, KRT9, KRT25, KRT1 |      | 1095 |
| KRT6C, KRT6A, KRT81, KRT72, KRT75, KRT74, KRT80, KRT77, KRT1 |      | 1095 |
| LOR, RPL36A, TUBB2A, RPL22L1, KRT33B, KRT81, KRT80, RPL39L,  |      | 853  |
| KRT6C, KRT6A, KRT6B, KRT31, KRT34, KRT33B, KRT72, KRT75, KF  |      | 1206 |
| KRT6C, KRT6A, KRT6B, KRT23, KRT33B, KRT81, KRT9, KRT25, KRT1 |      | 1208 |
| KRT6C, KRT6A, KRT6B, LMNB2, KRT23, KRT33B, KRT81, KRT9, KRT1 |      | 908  |
| KRT6C, KRT6A, KRT6B, KRT10, KRT81, KRT9, KRT72, KRT75, KRT7  |      | 908  |
| KRT6C, KRT6A, KRT6B, LMNB2, KRT23, KRT33B, KRT81, KRT9, KRT1 |      | 908  |
| KRT9, KRT25, KRT28, KRT17, KRT16, KRT15, KRT14, KRT31, KRT1  |      | 1095 |

| Genes                                                        | List | Tota |
|--------------------------------------------------------------|------|------|
| LOR, PPARD, LCE3A, PTGS2, S100A7, SPINK5, PLOD1, LCE2D, KRT1 |      | 924  |
| LOR, PPARD, PTGS2, LCE3A, S100A7, SPINK5, PLOD1, LCE2D, KRT1 |      | 924  |
| LOR, LCE4A, LCE3A, LCE5A, LCE6A, LCE2C, LCE2B, LCE2A, SPRR2  |      | 1208 |
| LOR, LCE4A, LCE3A, LCE5A, LCE6A, LCE2C, LCE2B, LCE2A, SPRR2  |      | 924  |
| LOR, LCE3A, S100A7, LCE5A, LCE1B, SPRR2F, SPRR2E, LCE1A, SE  |      | 924  |
| LOR, LCE3A, S100A7, LCE5A, LCE1B, SPRR2F, SPRR2E, LCE1A, SE  |      | 924  |
| LCE5A, LCE2C, LCE2B, SPRR2F, LCE1B, LCE2A, SPRR2E, LCE1A, I  |      | 1095 |
| LOR, LCE3A, S100A7, LCE5A, LCE1B, SPRR2F, SPRR2E, LCE1A, SE  |      | 924  |
| LOR, LCE3A, S100A7, LCE5A, HOXA11, LCE1B, SPRR2F, SPRR2E, I  |      | 924  |
| LOR, SPRR2D, SPRR1A, RPTN, SPRR1B, SPRR2A, TGM1, SPRR2F, SE  |      | 908  |

| Genes                                                       | List | Tota |
|-------------------------------------------------------------|------|------|
| RALY, RPL36A, SNRPD3, LSM6, SNRPD1, RPL22L1, PCBP4, PCBP1,  |      | 1208 |
| RALY, RPP38, RPL36A, SNRPD3, LSM6, SNRPD1, RPS6KB2, RPL22L1 |      | 908  |
| MRPS17, RPL36A, MRPS15, MRPS12, RPS6KB2, RPL22L1, RPL39, MF |      | 1208 |
| MRPS17, RPL36A, MRPS15, MRPS12, RPL22L1, RPL39, MRPL11, RPI |      | 853  |
| MRPS17, RPL36A, MRPS15, MRPS12, RPS6KB2, RPL22L1, RPL39, MF |      | 908  |
| MRPL1, MRPS17, MRPL51, MRPS15, MRPS22, MRPS12, MRPL9, MRPS2 |      | 908  |
| MRPL1, MRPS17, MRPL51, MRPS15, MRPS22, MRPS12, MRPL9, MRPS2 |      | 908  |

|                                                             |     |
|-------------------------------------------------------------|-----|
| MRPS17, RPL36A, MRPS15, PSTK, MRPS12, PABPC4, RPS6KB2, RPL2 | 924 |
| MRPS17, MRPS15, MRPS12, RPL39, MRPL11, RPS25, RPL30, RPL7,  | 908 |
| MRPS17, MRPS15, MRPS22, MRPS12, MRPS21, MRPS6, RPS7, RPS25, | 908 |
| MRPS17, MRPS18C, MRPS15, MRPS9, MRPS18A, MRPS22, MRPS21     | 908 |
| MRPS17, MRPS18C, MRPS15, MRPS9, MRPS18A, MRPS22, MRPS21     | 908 |

| Genes                                                       | List | Tota |
|-------------------------------------------------------------|------|------|
| RALY, RPP38, RPL36A, SNRPD3, LSM6, SNRPD1, RPS6KB2, RPL22L1 |      | 908  |
| RPP38, RALY, RPL36A, LSM6, SNRPD3, SNRPD1, RP9, YBX1, PCBP1 |      | 924  |
| RALY, RPL36A, LSM6, SNRPD1, TIMM50, YBX1, PCBP4, PCBP1, U2A |      | 853  |

| Genes                                                       | List | Tota |
|-------------------------------------------------------------|------|------|
| SHFM1, PSMA7, PSMB5, PSMA2, PSMB4, PSMB7, PSMB1, PSMC4, PSM |      | 325  |
| SHFM1, PSMA7, PSMB5, PSMA2, PSMB4, PSMB7, PSMB1, PSMC4, PSM |      | 1208 |
| SHFM1, PSMA7, PSMB5, PSMA2, PSMB4, PSMB7, PSMB1, PSMC4, PSM |      | 908  |
| UBE2C, PSMA7, PSMB5, PSMA2, PSMB4, PSMB7, PSMB1, PSMC4, PSM |      | 924  |
| UBE2C, PSMA7, PSMB5, PSMA2, PSMB4, PSMB7, PSMB1, PSMC4, PSM |      | 924  |
| UBE2C, PSMA7, PSMB5, PSMA2, PSMB4, PSMB7, PSMB1, PSMC4, PSM |      | 924  |
| UBE2C, PSMA7, PSMB5, PSMA2, PSMB4, PSMB7, PSMB1, PSMC4, PSM |      | 924  |
| PSMA2, PSMB5, PSMB4, PSMB7, PSMB1, PSMA5, PSMA4, PSMB3, PSM |      | 1095 |
| UBE2C, PSMA7, PSMB5, PSMA2, PSMB4, PSMB7, PSMB1, PSMC4, PSM |      | 924  |
| PSMA2, PSMB5, PSMB4, PSMB7, PSMB1, PSMA5, PSMA4, PSMB3, PSM |      | 1208 |
| UBE2C, PSMA7, PSMB5, PSMA2, PSMB4, PSMB7, PSMB1, PSMC4, PSM |      | 924  |
| PSMA2, PSMB5, PSMB4, PSMB7, PSMB1, PSMA5, PSMA4, PSMB3, PSM |      | 853  |
| PSMA2, PSMB5, PSMB4, PSMB7, PSMB1, PSMA5, PSMA4, PSMB3, PSM |      | 853  |
| UBE2C, PSMA7, PSMB5, PSMA2, PSMB4, PSMB7, PSMB1, PSMC4, PSM |      | 924  |
| PSMA2, PSMB5, PSMB4, PSMB1, PSMA5, PSMA4, PSMB3, PSMA3, PSM |      | 1208 |
| UBE2C, PSMA7, PSMB5, PSMA2, PSMB4, PSMB7, PSMB1, PSMC4, PSM |      | 924  |
| PSMA2, PSMB5, PSMB4, PSMB7, PSMB1, PSMA5, PSMA4, PSMB3, PSM |      | 908  |
| UBE2C, PSMA7, PSMB5, PSMA2, PSMB4, PSMB7, PSMB1, PSMC4, PSM |      | 924  |
| NHLRC1, UBE2C, PSMA7, PSMB5, PSMA2, PSMB4, PSMB7, PSMB1, PS |      | 924  |
| UBE2C, PSMA7, PSMB5, PSMA2, PSMB4, PSMB7, PSMB1, PSMC4, PSM |      | 924  |
| UBE2C, PSMA7, PSMB5, PSMA2, PSMB4, PSMB7, PSMB1, PSMC4, PSM |      | 924  |
| NHLRC1, UBE2C, PSMA7, PSMB5, PSMA2, PSMB4, PSMB7, PSMB1, PS |      | 924  |
| PSMB5, PSMB4, PSMB7, PSMB1, PSMA5, PSMB3, PSMB2, PSMA7      |      | 1095 |
| UBE2G2, UBE2C, PSMA7, PSMB5, PSMA2, PSMB4, PSMB7, PSMB1, PS |      | 924  |
| UBE2G2, UBE2C, PSMA7, PSMB5, PSMA2, PSMB4, PSMB7, PSMB1, PS |      | 924  |
| PSMB5, PSMB4, PSMB7, PSMB1, PSMA4, PSMB3, PSMB2             |      | 1095 |
| TUBB2A, KATNB1, PKMYT1, PTTG2, PTTG1, RCC1, PSMA7, PSMB5, F |      | 924  |
| NF2, UBE2C, PSMA7, PSMB5, PSMA2, PSMB4, PSMB7, PSMB1, PSMC4 |      | 924  |
| PSMA2, PSMB1, PSMA4, PSMA3, PSMD7, PSMD8, RPS27A            |      | 1208 |
| PSMA2, PSMA5, PSMA4, PSMA3, PSMA7                           |      | 1095 |
| IGF2BP1, PSMA7, PSMB5, PSMB4, PSMB7, PSMB1, PSMB3, PSMB2, F |      | 924  |
| TUBB2A, PKMYT1, PTTG2, PTTG1, STRA8, PCBP4, PSMD2, PSMD4, F |      | 924  |
| IGF2, NHLRC1, IL34, UBE2C, PSMA7, IL11, PSMB5, PSMA2, PSMB4 |      | 924  |
| NF2, IGF2BP1, IGF2, UBE2C, PSMA7, PSMB5, PSMA2, PSMB4, PSME |      | 924  |



|                                                             |     |
|-------------------------------------------------------------|-----|
| STEAP3, S100A6, TUBB2A, PKMYT1, PTTG2, PTTG1, STRA8, PCBP4, | 924 |
| HR, SFN, PSMA7, PSMB5, PSMB4, PSMB7, PSMB1, WWP2, PSMB3, PS | 924 |
| SFN, PSMA7, PSMB5, PSMB4, PSMB7, PSMB1, PSMB3, PSMB2, PSMD2 | 924 |
| USP5, UCHL1, UBE2G2, PSMA7, PSMB5, PSMB4, PSMB7, PSMB1, PSM | 924 |
| PPARD, HR, MAF1, NR2E1, KCNIP3, TBPL2, SAP30, STRA8, WWP2,  | 924 |
| IGF2, NHLRC1, IL34, UBE2C, PSMA7, IL11, PSMB5, PSMA2, PSMB4 | 924 |
| NHLRC1, IL34, PSMA7, IL11, PSMB5, MAP3K6, PSMB4, PSMB7, PSM | 924 |

| Genes                                                       | List | Tota |
|-------------------------------------------------------------|------|------|
| S100A4, S100A6, S100P, S100A16, S100A8, S100A7, S100A9, S1C |      | 1095 |
| S100A4, S100A6, S100P, S100A16, S100A8, S100A7, S100A9, S1C |      | 1095 |
| S100A4, S100A16, S100P, S100A8, S100A7, RPTN, S100A9, S100A |      | 1206 |
| S100A4, S100A6, S100P, S100A8, S100A7, S100A9, S100A11, S1C |      | 561  |
| S100A4, S100A16, S100P, S100A8, RPTN, S100A9, S100A11, S10C |      | 1206 |
| S100A4, S100A6, S100P, HPCAL1, S100A8, S100A7, S100A9, S10C |      | 1208 |
| S100A4, S100A6, S100A16, S100P, HPCAL1, S100A8, NCALD, TNNC |      | 1206 |
| S100A4, S100A6, S100A16, HPCAL1, S100P, S100A8, NCALD, TNNC |      | 1206 |
| S100A4, S100A6, S100A8, TNNC1, S100A7, S100A9, NCS1, NECAB2 |      | 1095 |
| S100A6, HPCAL1, S100A8, TNNC1, NCALD, S100A9, S100A11, NCS1 |      | 1095 |
| S100A4, S100A6, S100A16, S100P, HPCAL1, S100A8, NCALD, TNNC |      | 1095 |
| S100A4, S100A6, S100A16, S100P, HPCAL1, S100A8, NCALD, TNNC |      | 1095 |

| Genes                                                       | List | Tota |
|-------------------------------------------------------------|------|------|
| SNRPA1, SNRPD3, SNRPB2, U2AF1, SNRPD1, SNRPA, SNRPC, SNRPF, |      | 94   |
| SNRPA1, NHP2L1, MAGOH, SNRPD3, LSM6, SNRPB2, SNRPD1, SF3B4, |      | 325  |
| LSM6, SNRPD3, SNRPD1, LSM5, LSM3, LSM2, SNRPF, SNRPE, SNRPC |      | 514  |
| RALY, NHP2L1, LSM6, SNRPD3, SNRPB2, SNRPD1, SF3B4, YBX1, SF |      | 1208 |
| LSM6, SNRPD3, SNRPD1, LSM5, LSM3, LSM2, SNRPF, SNRPE, SNRPC |      | 1095 |
| LSM6, SNRPD3, SNRPD1, LSM5, LSM3, LSM2, SNRPF, SNRPE, SNRPC |      | 1095 |
| SNRPA1, LSM6, SNRPD3, SNRPB2, SNRPD1, PHF5A, SNRPC, SNRPF,  |      | 908  |
| RALY, NHP2L1, LSM6, SNRPD3, SNRPB2, SNRPD1, SF3B4, YBX1, SF |      | 1208 |
| POLR2H, RALY, RPL36A, POLR2F, NHP2L1, LSM6, SNRPD3, SNRPB2, |      | 924  |
| RPP38, RALY, RPL36A, LSM6, SNRPD3, SNRPD1, RP9, YBX1, PCBP1 |      | 924  |
| RALY, SNRPA1, NHP2L1, MAGOH, SNRPD3, SNRPB2, SNRPD1, SF3B4, |      | 1208 |
| POLR2H, RALY, ZC3H3, POLR2F, RPL36A, NHP2L1, LSM6, SNRPD3,  |      | 924  |
| RALY, TXNL4B, SNRPA1, NHP2L1, MAGOH, SNRPD3, SNRPB2, SNRPD1 |      | 908  |
| POLR2H, SNRPA1, RPL36A, POLR2F, NHP2L1, MAGOH, SNRPD3, PTBF |      | 924  |
| POLR2H, SNRPA1, RPL36A, POLR2F, NHP2L1, MAGOH, SNRPD3, PTBF |      | 924  |
| POLR2H, SNRPA1, RPL36A, POLR2F, NHP2L1, MAGOH, SNRPD3, PTBF |      | 924  |
| POLR2H, RALY, ZC3H3, POLR2F, RPL36A, NHP2L1, LSM6, SNRPD3,  |      | 924  |
| RALY, RPL36A, LSM6, SNRPD3, TIMM50, YBX1, PCBP4, PCBP1, LSM |      | 1208 |
| SNRPD3, WDR77, SNRPD1, SNRPC, SNRPF, SNRPE, SNRPG           |      | 924  |

| Genes                                                       | List | Tota |
|-------------------------------------------------------------|------|------|
| LYPD2, LYPD1, SLURP1, LYNX1, LYPD3, LY6D, LY6E, LYPD5, LY6C |      | 1095 |

|                                                             |      |
|-------------------------------------------------------------|------|
| LYPD2, LYPD1, SLURP1, LYNX1, LYPD3, LY6D, LY6E, PLAUR       | 514  |
| LYPD2, LYPD1, SLURP1, LYNX1, LY6D, LY6E, LYPD5, LY6G6C, LY6 | 1206 |
| LYPD2, LYPD1, SLURP1, LYNX1, LYPD3, LY6D, LY6E, PLAUR       | 1095 |
| LYPD2, SLURP1, LYNX1, LYPD3, LY6D, LY6E, LYPD5, PLAUR       | 1095 |
| LYPD2, LYNX1, LY6D, LY6E, LY6K                              | 561  |
| LYPD2, LYPD1, LYPD3, LYPD5, MFI2, PRSS41, LY6G6C, RTN4R, LY | 1208 |

| Genes                                                       | List | Tota |
|-------------------------------------------------------------|------|------|
| WFDC12, WFIKKN2, UMODL1, PI3, SLPI, WFDC1, WFDC5, WFDC3     |      | 1095 |
| WFIKKN2, LRIT2, SERPINA12, SPINT1, SERPINH1, SPINK5, SPINK7 |      | 853  |
| WFDC12, WFIKKN2, UMODL1, PI3, SLPI, WFDC1, WFDC5, WFDC3     |      | 514  |
| WFIKKN2, LRIT2, SERPINA12, PTTG2, PTTG1, SERPINH1, SPINK5,  |      | 853  |
| WFDC12, WFIKKN2, UMODL1, PI3, SLPI, WFDC1, WFDC5, WFDC3     |      | 1095 |
| WFIKKN2, SERPINA12, SPINT1, SPINK5, SPINK7, WFDC12, PI3, SE |      | 1208 |
| WFIKKN2, LRIT2, SERPINA12, PTTG2, PTTG1, SERPINH1, SPINK5,  |      | 853  |
| KNG1, WFIKKN2, SERPINA12, SPINT1, R3HDML, SPINK5, SPINK7, W |      | 1208 |
| WFDC12, PI3, SLPI, WFDC5, WFDC3                             |      | 1095 |
| WFIKKN2, SERPINB2, SPINT1, SERPINB11, SERPINB4, SERPINB12,  |      | 1206 |
| WFDC12, WFIKKN2, UMODL1, PI3, WFDC1                         |      | 1206 |
| WFIKKN2, LRIT2, SERPINA12, RTKN, PTTG2, SFN, PTTG1, SERPINH |      | 853  |
| SERPINA12, SERPINB2, SERPINB11, SERPINB4, SERPINB12, SERPIN |      | 514  |
| SERPINA12, SERPINB2, SERPINB11, SERPINB4, SERPINB12, SERPIN |      | 561  |
| SERPINA12, SERPINB2, SERPINB11, SERPINB4, SERPINB12, SERPIN |      | 1095 |
| SLPI, WFDC5, WFDC3                                          |      | 1206 |
| SLPI, WFDC5, WFDC3                                          |      | 1206 |

| Genes                                                       | List | Tota |
|-------------------------------------------------------------|------|------|
| KLK6, KLK7, KLK8, KLK9, PRSS41, KLK5, KLK1, TMPRSS5, HTRA2, |      | 514  |
| KLK6, KLK7, KLK8, KLK9, PRSS41, KLK5, KLK1, TMPRSS5, PARL,  |      | 1208 |
| KLK6, KLK7, KLK8, KLK9, PRSS41, KLK5, KLK1, TMPRSS5, TMPRSS |      | 1206 |
| KLK6, KLK7, KLK8, KLK9, PRSS41, KLK5, KLK1, TMPRSS5, TMPRSS |      | 1095 |
| KLK6, KLK7, KLK8, KLK9, PRSS41, KLK5, KLK1, TMPRSS5, TMPRSS |      | 1095 |
| KLK6, KLK7, KLK8, KLK9, PRSS41, KLK5, KLK1, TMPRSS5, PWP2,  |      | 853  |
| KLK6, KLK7, KLK8, KLK9, PRSS41, KLK5, KLK1, TMPRSS5, HTRA2, |      | 1095 |
| PRSS41, HTRA2, PARL, PRSS3, PCSK9, KLK10, PRSS33, KLK15, TM |      | 853  |
| PRSS41, NOTUM, HTRA2, PRSS3, PCSK9, KLK10, PRSS33, PTS, KLK |      | 1206 |
| PRSS41, HTRA2, PARL, PRSS3, PCSK9, KLK10, PRSS33, KLK15, TM |      | 853  |
| PDIA3, USP5, PRSS41, UCHL1, RCE1, PSMA7, PSMB5, PSMB4, PSME |      | 853  |
| PDIA3, UCHL1, PRSS41, RCE1, SPINK5, PARL, HTRA2, KLK10, PRS |      | 853  |
| USP5, PRSS41, UCHL1, PSMA7, SPINK5, PSMB5, PSMB4, PSMB7, HT |      | 1208 |
| PDIA3, USP5, PRSS41, UCHL1, RCE1, PSMA7, PSMB5, PSMB4, PSME |      | 853  |

| Genes                                                       | List | Tota |
|-------------------------------------------------------------|------|------|
| PVR, S100A8, S100A7, S100A9, IL17RE, NOTUM, IL11, REG3A, PC |      | 1208 |
| PVR, LYPD2, LYPD1, LYPD3, PTGS2, LYPD5, L1CAM, NOTUM, PLOD1 |      | 1208 |

PVR, S100A7, IL17RE, NOTUM, IL11, REG3A, PGLYRP4, ST3GAL4, 908

| Genes                                                       | List | Tota |
|-------------------------------------------------------------|------|------|
| MAGED1, TYR, MAGEA12, TACSTD2, MAGEA2, MAGEA11, MAGEA6, MAC |      | 1208 |
| MAGED1, MAGEA12, MAGEA2, MAGEA11, MAGEA6, MAGED4, MAGEA3, M |      | 1206 |
| MAGED1, MAGEA12, MAGEA2, MAGEA11, MAGEA6, MAGED4, MAGEA3, M |      | 1095 |

| Genes                                                       | List | Tota |
|-------------------------------------------------------------|------|------|
| S100A4, RPP38, LOR, RPL36A, PTGS2, SNRPD3, XRCC6, S100A9, F |      | 908  |
| S100A4, RPP38, LOR, RPL36A, PTGS2, SNRPD3, XRCC6, S100A9, F |      | 908  |
| S100A4, RPP38, LOR, RPL36A, PTGS2, SNRPD3, XRCC6, S100A9, F |      | 908  |
| RPP38, S100A4, RPL36A, LYAR, SNRPD3, UCHL1, S100A9, TCOF1,  |      | 908  |
| S100A4, RPP38, LOR, RPL36A, SNRPD3, S100A9, XRCC6, HOXD12,  |      | 908  |

| Genes                                                       | List | Tota |
|-------------------------------------------------------------|------|------|
| P4HB, TXNDC12, PDIA3, NXN, PRDX6, TXN, PRDX4, PDIA6, PDIA5, |      | 1095 |
| P4HB, PDIA3, TXN, PDIA6, PDIA5, PDIA4                       |      | 1095 |
| P4HB, PDIA3, TXN, PDIA6, PDIA4                              |      | 1208 |
| P4HB, TXNDC12, PDIA3, PRDX6, TXN, PRDX4, PDIA6, PDIA5, PDIA |      | 1208 |
| P4HB, TXNDC12, PDIA3, NXN, TXN, PDIA6, PDIA5, PDIA4         |      | 1095 |
| P4HB, PDIA3, PDIA6, PDIA5, PDIA4                            |      | 1206 |
| P4HB, PDIA3, PDIA6, PDIA5, PDIA4                            |      | 1206 |
| P4HB, PDIA3, PDIA6, PDIA5, PDIA4                            |      | 853  |
| P4HB, PDIA3, PDIA6, PDIA5, PDIA4                            |      | 853  |
| P4HB, TPI1, PDIA3, PDIA6, PDIA5, RPIA, IDI2, PDIA4, SIGMAR1 |      | 853  |
| P4HB, PDIA3, PDIA6, PDIA5, PDIA4                            |      | 853  |
| P4HB, TXNDC12, PDIA3, NXN, PRDX6, TXN, PRDX4, PDIA6, PDIA5, |      | 924  |
| P4HB, PDIA3, PDIA6, PDIA4                                   |      | 1095 |
| P4HB, PDIA3, TXN, PDIA6                                     |      | 1206 |
| P4HB, PDIA3, PDIA6, PDIA5                                   |      | 561  |
| TXNL4B, P4HB, PDIA3, PRDX4, PDIA6, PDIA5, PDIA4, PRDX1, TXN |      | 1095 |
| P4HB, PDIA3, PDIA6                                          |      | 1206 |
| P4HB, PDIA3, PDIA6                                          |      | 1206 |
| P4HB, PDIA3, PDIA4                                          |      | 1095 |
| P4HB, TXNDC12, PDIA3, PTGS2, P4HA2, PDIA6, SUMF2, IGF2, PDI |      | 908  |
| P4HB, PDIA3, TXN, PDIA6, PDIA5, PDIA4                       |      | 1095 |
| P4HB, TPI1, PDIA3, PDIA4                                    |      | 1208 |

| Genes                                                       | List | Tota |
|-------------------------------------------------------------|------|------|
| SDHA, SDHB, SUCLG1, SDHC, IDH2, MDH2, MDH1                  |      | 1208 |
| SDHA, SDHB, UQCRH, SUCLG1, SDHC, IDH2, MDH2, UQCRB, MDH1    |      | 924  |
| NDUFB3, NDUFA4, NDUFB5, SUCLG1, NDUFA6, NDUFB9, SDHA, SDHB, |      | 924  |
| SDHA, SDHB, SUCLG1, SDHC, IDH2, PDHA1, MDH2, MDH1           |      | 325  |
| SDHA, SDHB, SUCLG1, SDHC, IDH2, MDH2, MDH1                  |      | 924  |

|                                                             |     |
|-------------------------------------------------------------|-----|
| SDHA, SDHB, SUCLG1, SDHC, IDH2, MDH2, MDH1                  | 924 |
| SDHA, SDHB, TDO2, SUCLG1, SDHC, IDH2, MDH2, MDH1            | 924 |
| SDHA, SDHB, UGT1A8, SUCLG1, SDHC, IDH2, MDH2, MDH1          | 924 |
| SDHA, SDHB, SUCLG1, SDHC, IDH2, MDH2, MDH1                  | 924 |
| NDUFB3, PRKAG3, NDUFA4, NDUFB5, NDUFB9, SUCLG1, NDUFA6, SDH | 924 |
| SDHA, SDHB, SDHC                                            | 853 |

| Genes                                                       | List | Total |
|-------------------------------------------------------------|------|-------|
| SMCP, TIMM50, UQCRCF1, MFF, NDUFS5, HTRA2, PARL, MRPL36, S  | 1208 |       |
| STOML2, TIMM50, UQCRCF1, MFF, NDUFS5, HTRA2, PARL, MRPL36,  | 908  |       |
| TIMM50, UQCRCF1, PARL, HTRA2, SLC25A3, MRPL36, MRPL37, PDHA | 1208 |       |
| NDUFB3, NDUFA4, NDUFB5, SLC25A5, NDUFA4L2, NDUFB9, NDUFA6,  | 325  |       |
| TIMM50, UQCRCF1, PARL, HTRA2, SLC25A3, MRPL36, MRPL37, PDHA | 1206 |       |
| MRPS17, MRPS15, MRPS12, KARS, MRPL11, MRPL16, MRPL36, MRPL3 | 908  |       |
| MRPS17, MRPS15, MRPS12, KARS, MRPL11, MRPL16, MRPL36, MRPL3 | 908  |       |
| NDUFB3, NDUFA4, NDUFB5, SUCLG1, NDUFA6, NDUFB9, SDHA, SDHB, | 924  |       |
| NIT2, STOML2, MFF, HTRA2, MRPL36, MRPL37, PDHA1, MRPL33, TM | 908  |       |
| S100A6, HTATIP2, LEMD2, STOML2, TIMM50, RANGAP1, UQCRCF1, M | 908  |       |
| S100A6, HTATIP2, LEMD2, STOML2, TIMM50, RANGAP1, UQCRCF1, M | 908  |       |
| NDUFB3, NDUFA4, NDUFB5, SLC25A5, NDUFB9, NDUFA6, TIMM50, UQ | 1208 |       |
| NDUFB3, NDUFB5, SAMM50, NDUFB9, STOML2, TIMM50, UQCRCF1, ME | 908  |       |
| NDUFB3, NDUFB5, SAMM50, NDUFB9, STOML2, TIMM50, UQCRCF1, ME | 908  |       |
| NDUFB3, NDUFA4, NDUFB5, SAMM50, NDUFB9, NDUFA6, TOMM40, TIM | 908  |       |
| NDUFB3, PRKAG3, NDUFA4, NDUFB5, NDUFB9, SUCLG1, NDUFA6, SDF | 924  |       |
| SDHA, NDUFB3, NDUFA4, SDHB, NDUFS5, NDUFB5, UQCRH, NDUFB9,  | 1208 |       |
| NDUFB3, POLR2H, NDUFA4, POLR2F, NDUFB5, SLC25A5, NDUFA4L2,  | 325  |       |
| NDUFB3, NDUFB5, LMNB2, NDUFB9, LEMD2, STOML2, TIMM50, UQCRE | 908  |       |
| SDHA, NDUFB3, NDUFA4, SDHB, NDUFS5, NDUFB5, UQCRH, NDUFB9,  | 924  |       |
| SDHA, NDUFB3, NDUFA4, NDUFS5, NDUFB5, UQCRH, NDUFB9, NDUFA6 | 908  |       |
| SDHA, NDUFB3, NDUFA4, NDUFS5, NDUFB5, UQCRH, NDUFB9, NDUFA6 | 908  |       |
| NDUFB3, NDUFB5, NDUFB9, STOML2, TIMM50, UQCRCF1, NDUFS5, P  | 908  |       |
| NDUFB3, NDUFA4, NDUFS5, NDUFB5, UQCRH, NDUFB9, NDUFA6, UQCF | 1208 |       |
| NDUFB3, NDUFA4, NDUFS5, NDUFB5, UQCRH, NDUFB9, NDUFA6, NDUF | 924  |       |
| NDUFB3, NDUFA4, NDUFS5, NDUFB5, UQCRH, NDUFB9, NDUFA6, NDUF | 924  |       |
| NDUFA4, NDUFB3, NDUFB5, NDUFA4L2, NDUFA6, NDUFB9, UQCRCF1,  | 325  |       |
| NDUFB3, PRKAG3, NDUFB5, PPARD, NDUFB9, PGAM1, POMC, UQCRCF1 | 924  |       |
| NDUFB3, NDUFA4, NDUFS5, NDUFB5, TP53I3, NDUFB9, NDUFA6, NDU | 853  |       |
| SDHA, NDUFB3, NDUFA4, SDHB, NDUFS5, NDUFB5, UQCRH, NDUFB9,  | 924  |       |

| Genes                                                      | List | Total |
|------------------------------------------------------------|------|-------|
| TUBA8, MSTO1, TUBB2A, TUBB6, TUBA4A, TUBA1B, TUBA1C, TUBB3 | 1095 |       |
| TUBA8, TUBB2A, TUBB6, TUBA4A, TUBA1B, TUBA1C, TUBB3        | 1095 |       |
| TUBA8, TUBB2A, TUBB6, TUBA4A, TUBA1B, TUBA1C, TUBB3        | 1095 |       |
| TUBA8, TUBB2A, TUBB6, TUBA4A, TUBA1B, TUBA1C, TUBB3        | 1095 |       |
| TUBA8, TUBB2A, TUBB6, TUBA4A, TUBA1B, TUBA1C, TUBB3        | 561  |       |
| TUBBP5, TUBA8, MSTO1, TUBB2A, RAC1, TUBB6, TUBA4A, TUBA1B, | 924  |       |

|                                                            |      |
|------------------------------------------------------------|------|
| TUBA8, TUBA4A, TUBA1B, TUBA1C                              | 1095 |
| MSTO1, OOE, SAMM50, IPO13, TUBB2A, THEG, SRC, TUBBP5, PSMC | 924  |

| Genes                                                       | List | Tota |
|-------------------------------------------------------------|------|------|
| SLC16A13, SLC36A2, SLC6A10P, SLC15A1, SLC34A1, SLC6A16, SLC |      | 853  |
| SLC16A13, SLC6A10P, SLC15A1, SLC34A1, SLC6A16, SLC6A18, SLC |      | 1208 |
| SLC1A5, SLC6A9, SLC6A10P, SLC6A8, SLC1A6, SLC5A9, SLC6A16,  |      | 853  |
| SLC36A2, SLC6A10P, SLC15A1, SLC6A16, SLC6A18, SLC10A3, SLC  |      | 853  |
| SLC6A9, SLC6A10P, SLC6A8, SLC18A3, SLC6A16, SLC6A18         |      | 853  |
| SLC6A9, SLC6A10P, SLC6A8, SLC6A16, SLC6A18                  |      | 853  |
| SLC6A9, SLC6A10P, SLC6A8, SLC6A16, SLC6A18                  |      | 1095 |

| Genes                                                       | List | Tota |
|-------------------------------------------------------------|------|------|
| MT1L, NOS1, MT1E, MT1G, MT1X, MT1F                          |      | 853  |
| MT1L, MT1E, MT4, MT1G, MT1X, MT1F                           |      | 1206 |
| MT1L, MT1E, MT4, MT1G, MT1X, MT1F                           |      | 1206 |
| MT1L, MT1E, MT4, MT1G, MT1X, MT1F                           |      | 1095 |
| MT1L, MT1E, MT4, MT1G, MT1X, MT1F                           |      | 1208 |
| MT1L, ZNF133, MFI2, MT1E, MT1G, MT1X, MT1F                  |      | 1208 |
| MT1L, MT1E, MT4, MT1G, MT1X, MT1F                           |      | 1095 |
| MT1L, MT1E, MT4, MT1G, MT1X, MT1F                           |      | 1095 |
| MT1L, MT1E, MT4, MT1G, MT1X, MT1F                           |      | 561  |
| STEAP3, TYRP1, TYR, MT1L, MT1E, MT4, MT1G, SOD3, MT1X, S10C |      | 1208 |
| MT1L, MT1E, MT1G, MT1X, MT1F                                |      | 1208 |
| MT1L, MT1E, MT1G, MT1X, MT1F                                |      | 1208 |
| MT1L, MT1E, MT1G, MT1X, MT1F                                |      | 1206 |
| MT1L, MT1E, MT1G, MT1X, MT1F                                |      | 1206 |

| Genes                                     | List | Tota |
|-------------------------------------------|------|------|
| WNT10A, WNT10B, WNT5B, WNT11, WNT6, WNT7A |      | 514  |
| WNT10A, WNT10B, WNT5B, WNT11, WNT6, WNT7A |      | 1095 |
| WNT10A, WNT10B, WNT5B, WNT11, WNT6, WNT7A |      | 1095 |
| WNT10A, WNT10B, WNT5B, WNT11, WNT6, WNT7A |      | 1095 |
| WNT10A, WNT10B, WNT5B, WNT11, WNT6, WNT7A |      | 561  |
| WNT10A, WNT10B, WNT5B, WNT11, WNT6, WNT7A |      | 924  |

| Genes                                                        | List | Tota |
|--------------------------------------------------------------|------|------|
| KRT25, PPARD, PTGS2, HOXC13, RELA, SNAIL1, SPINK5, KRT71, NS |      | 924  |
| KRT25, PPARD, PTGS2, HOXC13, RELA, SNAIL1, SPINK5, KRT71, NS |      | 924  |
| KRT25, PPARD, PTGS2, HOXC13, RELA, SNAIL1, SPINK5, KRT71, NS |      | 924  |
| KRT25, PPARD, PTGS2, HOXC13, RELA, SNAIL1, SPINK5, KRT71, NS |      | 924  |
| KRT25, PPARD, PTGS2, HOXC13, RELA, SNAIL1, SPINK5, KRT71, NS |      | 924  |

| Genes                                                       | List | Tota |
|-------------------------------------------------------------|------|------|
| TALDO1, PFKL, PGM1, PGD, PFKP, TKT, RPIA, TKTL1             |      | 325  |
| TALDO1, PFKL, PGD, NUDT5, PGAM1, PFKP, TKTL1, HYAL4, TPI1,  |      | 924  |
| TPI1, TALDO1, PFKL, PGM1, PGD, PGAM1, PFKP, PDHA1, RPIA, TF |      | 924  |
| TYRP1, TALDO1, RBP1, PGD, PNP, RDH12, TPI1, TP53I3, TYR, TI |      | 924  |
| TALDO1, PFKL, NUDT5, PGD, PGAM1, PFKP, TKTL1, TPI1, PGM1, F |      | 924  |
| TALDO1, PFKL, NUDT5, PGD, PGAM1, PFKP, TKTL1, TPI1, PGM1, F |      | 924  |
| TDO2, TPI1, TP53I3, TALDO1, PGD, RPIA, PNP, MDH2, MDH1      |      | 924  |
| TDO2, TPI1, TP53I3, TALDO1, PGD, RPIA, PNP, MDH2, MDH1      |      | 924  |
| TDO2, TPI1, TP53I3, TALDO1, PGD, RPIA, PNP, MDH2, MDH1      |      | 924  |
| TPI1, TALDO1, PFKL, PGM1, PGD, PGAM1, PFKP, PDHA1, RPIA, TF |      | 924  |
| TDO2, TPI1, TP53I3, TALDO1, PGD, RPIA, PNP, MDH2, MDH1      |      | 924  |
| PRKAG3, PPARD, TALDO1, PFKL, SERPINA12, SLC37A4, PGD, PGAM1 |      | 924  |
| TALDO1, PFKL, NUDT5, PGD, PGAM1, PFKP, TKTL1, TPI1, PGM1, F |      | 924  |
| TPI1, TALDO1, PGD                                           |      | 1208 |
| TPI1, TALDO1, PGD, RPIA                                     |      | 924  |
| TPI1, TP53I3, TALDO1, PGD, RPIA                             |      | 924  |
| PRKAG3, PPARD, TALDO1, PFKL, SERPINA12, SLC37A4, PGD, PGAM1 |      | 924  |
| TDO2, TPI1, TP53I3, TALDO1, PGD, RPIA, PNP, MDH2, MDH1      |      | 924  |
| TALDO1, NUDT5, PGD, RPIA                                    |      | 924  |
| TDO2, TPI1, TP53I3, TALDO1, PGD, RPIA, PNP, MDH2, MDH1      |      | 924  |
| TPI1, PFKL, PGM1, PGAM1, PFKP, PDHA1, MDH2, MDH1            |      | 924  |
| PRKAG3, PPARD, TALDO1, PFKL, SERPINA12, SLC37A4, PGD, NUDT5 |      | 924  |

| Genes                         | List | Tota |
|-------------------------------|------|------|
| RAET1E, RAET1G, ULBP2, RAET1L |      | 1206 |
| RAET1E, RAET1G, ULBP2, RAET1L |      | 1206 |
| RAET1E, ULBP2, RAET1L         |      | 561  |

| Genes                              | List | Tota |
|------------------------------------|------|------|
| RANBP1, RANGAP1, SNHG3, RCC1       |      | 94   |
| NUP62, NUTF2, RANGAP1, SNHG3, RCC1 |      | 94   |
| RANBP1, RANGAP1, SNHG3, RCC1       |      | 94   |

| Genes                                        | List | Tota |
|----------------------------------------------|------|------|
| RPUSD4, PUS3, PUS1, RPUSD3, PGM1, PGAM1, LSS |      | 853  |
| RPUSD4, PUS3, PUS1, RPUSD3, NOP10            |      | 924  |
| RPUSD4, PUS3, PUS1, RPUSD3                   |      | 853  |

| Genes                                                       | List | Tota |
|-------------------------------------------------------------|------|------|
| MSTO1, SAMM50, TOMM40, PI4KB, VDAC2, MFF, TOMM6, TOMM5, TOM |      | 1208 |
| MSTO1, SAMM50, TOMM40, PI4KB, VDAC2, MFF, TOMM6, TOMM5, TOM |      | 908  |
| MSTO1, SAMM50, TOMM40, PI4KB, VDAC2, SIGMAR1, MFF, TOMM6, T |      | 908  |
| MSTO1, SAMM50, TOMM40, PI4KB, VDAC2, SIGMAR1, MFF, TOMM6, T |      | 908  |

| Genes                                                       | List | Tota |
|-------------------------------------------------------------|------|------|
| UBE2G2, UBE2I, TMEM189, UBE2L3, UBE2C, UBE2S, UBE2Q1, UBE2F |      | 514  |
| UBE2G2, UBE2I, TMEM189, UBE2L3, UBE2C, UBE2S, UBE2Q1, UBE2F |      | 1095 |
| UBE2G2, UBE2I, TMEM189, UBE2L3, UBE2C, UBE2S, UBE2Q1, UBE2F |      | 1095 |

| Genes                                                       | List | Tota |
|-------------------------------------------------------------|------|------|
| TRIM16L, TRIM65, TRIM47, TRIM48, TRIM43, TRIM50, TRIM16, R  |      | 1095 |
| TRIM55, TRIM65, TRIM47, TRIM48, TRIM43, TRIM29, TRIM31, TRI |      | 514  |
| TRIM55, TRIM65, TRIM47, TRIM48, TRIM43, TRIM29, TRIM31, TRI |      | 1206 |
| RNF17, RNF220, TRIM50, NHLRC1, TRIM15, TRIM10, TRAIP, RNF22 |      | 1206 |
| TRIM16L, TRIM65, TRIM47, TRIM48, HNRNPUL2, TRIM43, TRIM50,  |      | 1206 |
| TRIM16L, TRIM47, TRIM50, TRIM16, RFPL3, TRIM15, TRIM10, TRI |      | 514  |
| TRIM55, TRIM65, TRIM47, TRIM48, TRIM43, TRIM29, TRIM31, TRI |      | 1095 |
| TRIM16L, TRIM65, TRIM47, TRIM48, HNRNPUL2, TRIM43, TRIM50,  |      | 1095 |
| TRIM43, TRIM50, TRIM15, TRIM10, TRIM1                       |      | 561  |
| TRIM16L, TRIM47, TRIM50, TRIM16, RFPL3, TRIM15, TRIM10, TRI |      | 1095 |
| TRIM16L, TRIM65, TRIM48, HNRNPUL2, TRIM43, TRIM50, TRIM16,  |      | 1095 |

| Genes                                                       | List | Tota |
|-------------------------------------------------------------|------|------|
| HPCAL1, TNNC1, NCALD, VSNL1, NCS1, KCNIP3                   |      | 1095 |
| HPCAL1, LPCAT1, NCALD, VSNL1, NCS1, MYL12A, KCNIP3          |      | 98   |
| S100A6, HPCAL1, S100A8, TNNC1, NCALD, S100A9, S100A11, NCS1 |      | 1095 |

| Genes                                     | List | Tota |
|-------------------------------------------|------|------|
| LCN2, LCN15, ORM1, RBP1, LCN9, PAEP, ORM2 |      | 1095 |
| LCN2, LCN15, ORM1, RBP1, LCN9, PAEP, ORM2 |      | 1095 |
| LCN2, LCN15, ORM1, LCN9, PAEP, ORM2       |      | 1095 |

| Genes                                                       | List | Tota |
|-------------------------------------------------------------|------|------|
| MRPL11, MRPL1, MRPL51, RPL30, MRPL15, RPL7, MRPL16, RPL39L, |      | 908  |
| MRPL11, MRPL1, MRPL51, MRPL16, MRPL36                       |      | 908  |
| MRPL11, MRPL1, MRPL51, MRPL16, MRPL36                       |      | 908  |

| Genes                                    | List | Tota |
|------------------------------------------|------|------|
| PPIAL4C, PPIF, PPIH, PPIAL4G, PPIA       |      | 561  |
| PPIAL4C, PPIF, PPIE, PPIH, PPIAL4G, PPIA |      | 1206 |
| PPIAL4C, PPIF, PPIE, PPIH, PPIAL4G, PPIA |      | 1095 |

| Genes                    | List | Tota |
|--------------------------|------|------|
| NXN, PRDX6, PRDX4, PRDX1 |      | 1095 |

|                                                   |      |
|---------------------------------------------------|------|
| PRDX6, PRDX4, PRDX1, SOD3                         | 1208 |
| MGST3, LPO, PTGS2, NXN, PRDX6, PRDX4, PRDX1, SOD3 | 853  |
| PRDX6, PRDX4, PRDX1                               | 1095 |
| PRDX6, PRDX4, PRDX1                               | 561  |

| Genes                                                       | List | Tota |
|-------------------------------------------------------------|------|------|
| RPL35A, RRP1, NHP2L1, SNRPD3, LSM6, SNRPD1, NOP10, MRT04, F |      | 924  |
| RPP38, PUS3, PUS1, LSM6, VARS, KARS, RPL7, NPM3, RPL5, MARS |      | 924  |
| RPL35A, RRP1, NHP2L1, LSM6, NOP10, MRT04, RPS7, PA2G4, RPL7 |      | 924  |
| RPL35A, PA2G4, RRP1, RPL7, LSM6, NPM3, RPL5, NOP56, PES1, T |      | 924  |

| Genes                                                       | List | Tota |
|-------------------------------------------------------------|------|------|
| STEAP3, TFR2, TTYH1, MFI2, TRPC7, SLC39A7, SLC30A3, SLC39A4 |      | 924  |
| TTYH1, SLC30A3, SLC39A4, TRPM2, SLC39A2, SLC39A1            |      | 853  |
| SLC30A3, SLC39A4, SLC39A2, SLC39A1                          |      | 853  |



| Pop Hits | Pop   | Total      | Fold      | Enri      | Bonferron            | Benjamini | FDR |
|----------|-------|------------|-----------|-----------|----------------------|-----------|-----|
| 64       | 19113 | 8.4193874  | 1.0564891 | 1.0564891 | 7.132188281824524E-  |           |     |
| 64       | 19113 | 8.4193874  | 1.0564891 | 1.0564891 | 7.132188281824524E-  |           |     |
| 70       | 19113 | 7.92412932 | 2.9048763 | 1.4524381 | 1.9610353478856754E- |           |     |
| 70       | 19113 | 7.92412932 | 2.9048763 | 1.4524381 | 1.9610353478856754E- |           |     |
| 70       | 19113 | 7.92412932 | 2.9048763 | 1.4524381 | 1.9610353478856754E- |           |     |
| 71       | 19113 | 7.81252185 | 2.2314497 | 1.7438165 | 3.531667712729469E-  |           |     |
| 73       | 19113 | 7.59848021 | 1.6341815 | 4.0854538 | 1.1032097244684905E- |           |     |
| 78       | 19235 | 7.14494184 | 4.3351841 | 4.3351841 | 1.1154005755248876E- |           |     |
| 75       | 19113 | 7.18454396 | 0.0112973 | 1.2022594 | 4.0581302635382673E- |           |     |
| 72       | 16659 | 6.97294522 | 2.6877733 | 2.6877733 | 3.1241013989147577E- |           |     |
| 72       | 16659 | 6.97294522 | 2.6877733 | 2.6877733 | 3.1241013989147577E- |           |     |
| 61       | 7396  | 6.91598721 | 1.1112727 | 1.1112727 | 2.967166883109699E-  |           |     |
| 73       | 16659 | 6.66901854 | 4.9838673 | 2.4919336 | 5.792938880072461E-  |           |     |
| 28       | 16659 | 10.3235814 | 4.4142467 | 1.4713785 | 5.129230373768223E-  |           |     |
| 634      | 12983 | 2.30466601 | 0.0983214 | 1.0983214 | 1.872946242542639E-  |           |     |
| 33       | 19113 | 9.12475502 | 4.4129098 | 4.0215164 | 1.6289192217300297E- |           |     |
| 144      | 19235 | 3.64902381 | 4.6896252 | 2.9379251 | 3.7794974927507496E- |           |     |
| 183      | 12782 | 2.84618817 | 4.8719992 | 2.4957395 | 2.406362427098685E-  |           |     |
| 88       | 12782 | 3.83920701 | 1.2801902 | 2.5603935 | 4.1145016038690585E- |           |     |
| 187      | 12782 | 2.78530701 | 1.3475460 | 2.2459227 | 4.330983063294269E-  |           |     |
| 33       | 16659 | 5.53225400 | 0.0066585 | 8.3474932 | 0.0077650275190466E- |           |     |

| Pop Hits | Pop   | Total      | Fold      | Enri      | Bonferron            | Benjamini | FDR |
|----------|-------|------------|-----------|-----------|----------------------|-----------|-----|
| 199      | 13528 | 4.41427911 | 1.4094234 | 1.4094234 | 9.118733031280933E-  |           |     |
| 184      | 13528 | 4.45586292 | 2.7654219 | 1.3827109 | 1.7891815684033596E- |           |     |
| 40       | 19235 | 9.15573266 | 6.3282712 | 2.1094237 | 1.6653345369377348E- |           |     |
| 43       | 13528 | 8.17154939 | 9.1826546 | 3.0608848 | 5.995204332975845E-  |           |     |
| 66       | 13528 | 6.43303169 | 9.1826546 | 2.2959412 | 5.995204332975845E-  |           |     |
| 72       | 13528 | 6.10028861 | 1.8365309 | 3.6726177 | 1.1879386363489175E- |           |     |
| 25       | 16659 | 10.3453151 | 1.7783108 | 4.4457770 | 2.0670132272471164E- |           |     |
| 137      | 13528 | 3.74032296 | 6.6159493 | 1.1026582 | 4.280408250068035E-  |           |     |
| 227      | 13528 | 2.57985772 | 0.0179439 | 2.2423610 | 1.3057067272947975E- |           |     |
| 22       | 12782 | 7.03854623 | 3.9920361 | 4.4363828 | 0.0012832710851506E- |           |     |

| Pop Hits | Pop   | Total      | Fold      | Enri      | Bonferron            | Benjamini | FDR |
|----------|-------|------------|-----------|-----------|----------------------|-----------|-----|
| 279      | 19235 | 3.42430396 | 6.3282712 | 3.1641356 | 1.6653345369377348E- |           |     |
| 515      | 12782 | 2.29606943 | 3.5660363 | 3.5660363 | 1.1461054327810416E- |           |     |
| 188      | 19235 | 3.30317826 | 6.2474653 | 1.5618663 | 1.6074118702746887E- |           |     |
| 168      | 12983 | 3.26151396 | 7.1306853 | 3.3565348 | 1.1449579728761705E- |           |     |
| 215      | 12782 | 2.68446886 | 6.3625535 | 3.1812818 | 2.044903516518204E-  |           |     |
| 48       | 12782 | 4.98563694 | 4.1455379 | 5.9223023 | 1.3323847221080598E- |           |     |
| 48       | 12782 | 4.98563694 | 4.1455379 | 5.9223023 | 1.3323847221080598E- |           |     |

|     |       |           |           |           |           |           |            |
|-----|-------|-----------|-----------|-----------|-----------|-----------|------------|
| 331 | 13528 | 2.0788898 | 0.0080812 | 4.5067803 | 0.0052495 | 0.0545404 | 13.5067803 |
| 128 | 12782 | 2.8594094 | 0.0013022 | 1.3030375 | 0.0041880 | 0.1698975 | 6.0041880  |
| 63  | 12782 | 3.1282427 | 0.1610234 | 0.0109132 | 0.5626932 | 4822497   | 69.5626932 |
| 18  | 12782 | 5.4744248 | 0.3867037 | 0.0241489 | 1.5590458 | 7914019   | 73.5590458 |
| 18  | 12782 | 5.4744248 | 0.3867037 | 0.0241489 | 1.5590458 | 7914019   | 73.5590458 |

| Pop Hits | Pop   | Total     | Fold      | Enri      | Bonferron | Benjamini | FDR        |
|----------|-------|-----------|-----------|-----------|-----------|-----------|------------|
| 515      | 12782 | 2.2960694 | 3.5660363 | 3.5660363 | 1.1461054 | 3278104   | 16.1461054 |
| 547      | 13528 | 1.6594569 | 0.2235317 | 0.0114341 | 0.1635525 | 8693930   | 84.1635525 |
| 718      | 12983 | 1.4838828 | 0.5242262 | 0.0600241 | 1.2589241 | 6443199   | 6.2589241  |

| Pop Hits | Pop   | Total     | Fold      | Enri      | Bonferron | Benjamini | FDR           |
|----------|-------|-----------|-----------|-----------|-----------|-----------|---------------|
| 47       | 5085  | 6.6579378 | 2.5325759 | 2.5325759 | 1.8725299 | 0890840   | 46.8725299    |
| 56       | 19235 | 5.6867904 | 3.2369083 | 4.6241553 | 8.3282505 | 3365127   | 1E+08.3282505 |
| 61       | 12782 | 4.6154401 | 9.2161509 | 2.3040457 | 2.9620443 | 1982083   | 35.9620443    |
| 65       | 13528 | 4.5048285 | 9.8251955 | 1.4036584 | 6.3570467 | 7676152   | 1E+06.3570467 |
| 65       | 13528 | 4.5048285 | 9.8251955 | 1.4036584 | 6.3570467 | 7676152   | 1E+06.3570467 |
| 67       | 13528 | 4.3703560 | 1.6900602 | 2.1127314 | 1.0935323 | 8897380   | 58.0935323    |
| 67       | 13528 | 4.3703560 | 1.6900602 | 2.1127314 | 1.0935323 | 8897380   | 58.0935323    |
| 19       | 16659 | 8.8079307 | 1.0883401 | 1.5548441 | 1.2650872 | 8359731   | 04.2650872    |
| 68       | 13528 | 4.3060860 | 2.1971484 | 2.1973657 | 1.4216733 | 3316141   | 37.4216733    |
| 20       | 19235 | 8.7576572 | 5.3812873 | 6.7267675 | 1.3845890 | 1655091   | 9E+01.3845890 |
| 70       | 13528 | 4.1830550 | 3.6522449 | 3.3207740 | 2.3633699 | 7228026   | 04.3633699    |
| 20       | 12983 | 8.3712192 | 1.3002960 | 4.3345079 | 2.2178813 | 6278711   | 08.2217881    |
| 20       | 12983 | 8.3712192 | 1.3002960 | 4.3345079 | 2.2178813 | 6278711   | 08.2217881    |
| 71       | 13528 | 4.1241387 | 4.6715672 | 3.8938064 | 3.0231271 | 5294572   | 6E+01.0231271 |
| 17       | 19235 | 9.3664783 | 1.2819903 | 1.4245148 | 3.2986420 | 7249119   | 8E+01.2986420 |
| 73       | 13528 | 4.0111486 | 7.5290587 | 5.7935972 | 4.8729974 | 1369628   | 95.8729974    |
| 20       | 12782 | 7.7424008 | 1.3006637 | 1.6259221 | 4.1805401 | 4394986   | 24.1805401    |
| 74       | 13528 | 3.9569439 | 9.4896853 | 6.7813349 | 6.1425632 | 1129769   | 1E+06.1425632 |
| 84       | 13528 | 3.6601731 | 0.0017546 | 1.1707213 | 0.0011362 | 1560307   | 03.0011362    |
| 78       | 13528 | 3.7540237 | 0.0022901 | 1.4328936 | 0.0014833 | 8826297   | 94.0014833    |
| 81       | 13528 | 3.6149858 | 0.0042453 | 2.5022944 | 0.0027525 | 0879617   | 77.0027525    |
| 100      | 13528 | 3.0745454 | 0.0304271 | 0.0016249 | 0.0199895 | 9040232   | 50.0199895    |
| 14       | 16659 | 8.6935420 | 0.0165843 | 0.0013926 | 0.0194363 | 3716312   | 54.0194363    |
| 102      | 13528 | 3.0142602 | 0.0412051 | 0.0021016 | 0.0272201 | 3118074   | 96.0272201    |
| 102      | 13528 | 3.0142602 | 0.0412051 | 0.0021016 | 0.0272201 | 3118074   | 96.0272201    |
| 12       | 16659 | 8.8746575 | 0.0709609 | 0.0045897 | 0.0855167 | 1793384   | 23.0855167    |
| 370      | 13528 | 1.8201942 | 0.2590433 | 0.0129507 | 0.1937860 | 5191621   | 15.0129507    |
| 119      | 13528 | 2.5836516 | 0.3376822 | 0.0170205 | 0.2662085 | 3815157   | 99.2662085    |
| 19       | 19235 | 5.8663733 | 0.3680589 | 0.0181908 | 1.1739123 | 7255323   | 19.0181908    |
| 8        | 16659 | 9.5085616 | 0.7735279 | 0.0600048 | 1.7114138 | 2317550   | 05.0600048    |
| 187      | 13528 | 1.9573118 | 0.9964795 | 0.1769996 | 3.5889269 | 8950250   | 55.1769996    |
| 565      | 13528 | 1.4770256 | 0.9997230 | 0.2086787 | 5.1619545 | 2701461   | 11.2086787    |
| 187      | 13528 | 1.8790193 | 0.9999931 | 0.2628109 | 7.4051053 | 5479811   | 3.4051053     |
| 180      | 13528 | 1.8707551 | 0.9999997 | 0.3006622 | 9.4702176 | 4475378   | 6.4702176     |

|     |       |           |           |           |                    |
|-----|-------|-----------|-----------|-----------|--------------------|
| 776 | 13528 | 1.3584147 | 0.9999999 | 0.3296675 | 10.99268269679714  |
| 334 | 13528 | 1.5780387 | 0.9999999 | 0.3436152 | 12.49451829394359  |
| 277 | 13528 | 1.5856345 | 1.0       | 0.4725574 | 22.312037173222976 |
| 242 | 13528 | 1.5729669 | 1.0       | 0.6188675 | 36.195179218660165 |
| 734 | 13528 | 1.2566262 | 1.0       | 0.7726653 | 56.560688977961405 |
| 233 | 13528 | 1.5080541 | 1.0       | 0.7773417 | 57.89239431192434  |
| 295 | 13528 | 1.4392545 | 1.0       | 0.7749229 | 58.036441322283515 |

| Pop | Hits  | Pop       | Total     | Fold      | Enri                | Bonferron | Benjamini | FDR |
|-----|-------|-----------|-----------|-----------|---------------------|-----------|-----------|-----|
| 27  | 16659 | 7.8885844 | 4.7193008 | 9.4386196 | 5.485436005425726E  |           |           |     |
| 28  | 16659 | 7.6068493 | 8.2802848 | 1.3800522 | 9.624529861973485E  |           |           |     |
| 21  | 19113 | 9.0561478 | 3.0821810 | 4.4031739 | 2.0807627842955867E |           |           |     |
| 19  | 7396  | 8.3264846 | 1.0049861 | 5.0249433 | 2.6833882160737232E |           |           |     |
| 18  | 19113 | 8.8045881 | 0.0011608 | 1.4518062 | 7.841266959407456E  |           |           |     |
| 60  | 19235 | 3.4499862 | 0.1561180 | 0.0076858 | 0.4357788753608149E |           |           |     |
| 182 | 19113 | 2.0028019 | 0.9987274 | 0.3407611 | 4.4008139766111505  |           |           |     |
| 182 | 19113 | 1.9157235 | 0.9999993 | 0.5091911 | 9.161913419398537   |           |           |     |
| 236 | 16659 | 1.6116206 | 0.9999999 | 0.5045342 | 30.740998468395876  |           |           |     |
| 130 | 16659 | 1.8724552 | 0.9999999 | 0.5194836 | 32.42016447430917   |           |           |     |
| 215 | 16659 | 1.6275119 | 0.9999999 | 0.5312858 | 35.05180197751066   |           |           |     |
| 217 | 16659 | 1.6125118 | 1.0       | 0.5501545 | 37.72144146870418   |           |           |     |

| Pop | Hits  | Pop        | Total     | Fold      | Enri                | Bonferron | Benjamini | FDR |
|-----|-------|------------|-----------|-----------|---------------------|-----------|-----------|-----|
| 15  | 1437  | 10.1914896 | 6.8756174 | 6.8756174 | 5.8290429538754296E |           |           |     |
| 126 | 5085  | 3.1043956  | 1.4300931 | 7.1507214 | 0.0010574490856951  |           |           |     |
| 17  | 9079  | 9.3512245  | 3.5424579 | 3.5424579 | 0.0019535348669830E |           |           |     |
| 209 | 19235 | 2.5141599  | 0.0014332 | 1.3038285 | 0.0036902585672904E |           |           |     |
| 17  | 16659 | 8.0543110  | 0.0067982 | 7.5765862 | 0.0079285891066649E |           |           |     |
| 19  | 16659 | 7.2064888  | 0.0186611 | 0.0014479 | 0.0218930671468386E |           |           |     |
| 24  | 12782 | 5.8654552  | 0.0094843 | 7.9382265 | 0.0306232089245739E |           |           |     |
| 260 | 19235 | 2.1434825  | 0.0222044 | 0.0014024 | 0.0577570159406848E |           |           |     |
| 284 | 13528 | 2.0105176  | 0.1273205 | 0.0064641 | 0.0880718903715327E |           |           |     |
| 547 | 13528 | 1.6594569  | 0.2235317 | 0.0114341 | 0.1635525869393084E |           |           |     |
| 120 | 19235 | 2.6538355  | 0.0916979 | 0.0045694 | 0.2471515231284193E |           |           |     |
| 321 | 13528 | 1.8243853  | 0.5787398 | 0.0339891 | 0.557758733613456E  |           |           |     |
| 132 | 12782 | 2.3461820  | 0.1561997 | 0.0112587 | 0.5443695808756255E |           |           |     |
| 153 | 13528 | 2.2008884  | 0.8531137 | 0.0711174 | 1.2333080295425902E |           |           |     |
| 153 | 13528 | 2.2008884  | 0.8531137 | 0.0711174 | 1.2333080295425902E |           |           |     |
| 153 | 13528 | 2.2008884  | 0.8531137 | 0.0711174 | 1.2333080295425902E |           |           |     |
| 370 | 13528 | 1.6223470  | 0.9991072 | 0.1916522 | 4.4409527212318505E |           |           |     |
| 540 | 19235 | 1.5038401  | 0.8871703 | 0.0659110 | 5.459090919896148E  |           |           |     |
| 28  | 13528 | 3.6601731  | 0.9999999 | 0.4023501 | 16.737265714412086E |           |           |     |

| Pop | Hits  | Pop       | Total     | Fold      | Enri                | Bonferron | Benjamini | FDR |
|-----|-------|-----------|-----------|-----------|---------------------|-----------|-----------|-----|
| 22  | 16659 | 6.9153175 | 0.0070864 | 7.1091500 | 0.0082658328457441E |           |           |     |

|     |       |            |            |            |                    |
|-----|-------|------------|------------|------------|--------------------|
| 16  | 9079  | 8.83171200 | 0.00300500 | 0.00100270 | 0.0165927581457836 |
| 20  | 19113 | 7.13171640 | 0.03994240 | 0.00451880 | 0.0275139916879552 |
| 16  | 16659 | 7.60684930 | 0.04839150 | 0.00330130 | 0.0576371829937194 |
| 18  | 16659 | 6.76164380 | 0.11556650 | 0.00679940 | 0.1426425684272869 |
| 8   | 7396  | 8.23975040 | 0.62174800 | 0.27679672 | 0.56241831635724   |
| 126 | 19235 | 2.14834300 | 0.95699820 | 0.08152537 | 0.776642797587541  |

| Pop | Hits | Pop   | Total      | Fold       | Enri        | Bonferron          | Benjamini | FDR |
|-----|------|-------|------------|------------|-------------|--------------------|-----------|-----|
| 13  |      | 16659 | 9.36227600 | 0.00882608 | 0.05603100  | 0.0103038352688433 |           |     |
| 92  |      | 12983 | 3.30878230 | 0.00594140 | 0.00148860  | 0.0101632028089992 |           |     |
| 15  |      | 9079  | 9.42049280 | 0.00177768 | 0.89214340  | 0.0098096177281736 |           |     |
| 153 |      | 12983 | 2.58647290 | 0.01803720 | 0.00363370  | 0.0310397703505826 |           |     |
| 15  |      | 16659 | 8.11397260 | 0.02914410 | 0.00211040  | 0.0343729223170052 |           |     |
| 80  |      | 19235 | 3.38364030 | 0.01755280 | 0.00126410  | 0.0455525158395642 |           |     |
| 145 |      | 12983 | 2.51923830 | 0.06034220 | 0.01031960  | 0.1060973565218614 |           |     |
| 107 |      | 19235 | 2.82745090 | 0.06221840 | 0.00337520  | 0.1651421491924876 |           |     |
| 8   |      | 16659 | 9.50856160 | 0.77352790 | 0.06000481  | 0.7114138231755005 |           |     |
| 45  |      | 19113 | 3.52183520 | 0.98917610 | 0.27623313  | 0.0092258162210284 |           |     |
| 10  |      | 19113 | 7.92412930 | 0.99831690 | 0.34675994  | 0.220229552961463  |           |     |
| 270 |      | 12983 | 1.74752720 | 0.94738450 | 0.15091584  | 0.89841438077635   |           |     |
| 40  |      | 9079  | 3.53268480 | 0.77935640 | 0.22265247  | 0.994655473414025  |           |     |
| 33  |      | 7396  | 3.19602440 | 0.99663960 | 0.612981414 | 0.107922505142835  |           |     |
| 40  |      | 16659 | 3.04273970 | 0.99999990 | 0.424835121 | 0.16935748088301   |           |     |
| 5   |      | 19113 | 9.50895521 | 1.0        | 0.946148846 | 0.8009336623934    |           |     |
| 5   |      | 19113 | 9.50895521 | 1.0        | 0.946148846 | 0.8009336623934    |           |     |

| Pop | Hits | Pop   | Total      | Fold       | Enri        | Bonferron          | Benjamini | FDR |
|-----|------|-------|------------|------------|-------------|--------------------|-----------|-----|
| 116 |      | 9079  | 3.04541790 | 0.00556510 | 0.00139420  | 0.0307656107350728 |           |     |
| 136 |      | 19235 | 2.69286250 | 0.02156740 | 0.00145250  | 0.0560823819511391 |           |     |
| 106 |      | 19113 | 2.84072560 | 0.24222700 | 0.02735600  | 0.1870738110201886 |           |     |
| 104 |      | 16659 | 2.77942570 | 0.17561050 | 0.01011230  | 0.2242099645241801 |           |     |
| 105 |      | 16659 | 2.75295490 | 0.19669310 | 0.01089110  | 0.2542498291643214 |           |     |
| 154 |      | 12983 | 2.37201010 | 0.14673570 | 0.02241440  | 0.2702834436653978 |           |     |
| 116 |      | 16659 | 2.62305140 | 0.23680690 | 0.01278630  | 0.3136224377767949 |           |     |
| 178 |      | 12983 | 2.13769640 | 0.42238560 | 0.05916090  | 0.9317297826890392 |           |     |
| 196 |      | 19113 | 2.10232000 | 0.80231330 | 0.12636211  | 0.0883935152434798 |           |     |
| 180 |      | 12983 | 2.11394420 | 0.47564260 | 0.05700021  | 0.0950422646154645 |           |     |
| 375 |      | 12983 | 1.70468460 | 0.54985800 | 0.05955241  | 0.3521444153651418 |           |     |
| 574 |      | 12983 | 1.40536780 | 0.99994980 | 0.375878915 | 0.535987646977157  |           |     |
| 484 |      | 19235 | 1.44754660 | 0.99966940 | 0.166528718 | 0.634159959722652  |           |     |
| 549 |      | 12983 | 1.33074520 | 0.99999990 | 0.667292543 | 0.05521292394378   |           |     |

| Pop  | Hits | Pop   | Total      | Fold       | Enri        | Bonferron          | Benjamini | FDR |
|------|------|-------|------------|------------|-------------|--------------------|-----------|-----|
| 1689 |      | 19235 | 1.44240430 | 0.00153991 | 0.28419750  | 0.0039651138010632 |           |     |
| 3250 |      | 19235 | 1.11216120 | 0.99999990 | 0.368520648 | 0.43531324779773   |           |     |

2010 12782 1.13457160.99999990.389901549.48476342343907

| Pop | Hits | Pop   | Total     | Fold      | Enri      | Bonferron  | Benjamini | FDR |
|-----|------|-------|-----------|-----------|-----------|------------|-----------|-----|
| 38  |      | 19235 | 4.1902666 | 0.2285041 | 0.0112159 | 0.6652500  | 2285032   | 77  |
| 32  |      | 19113 | 3.9620646 | 0.9998083 | 0.3955999 | 5.6148080  | 7446211   | 8   |
| 35  |      | 16659 | 3.4774168 | 0.9999429 | 0.2498013 | 10.7372434 | 8199134   | 2   |

| Pop  | Hits | Pop   | Total     | Fold      | Enri      | Bonferron  | Benjamini | FDR |
|------|------|-------|-----------|-----------|-----------|------------|-----------|-----|
| 1779 |      | 12782 | 1.2898066 | 0.1384611 | 0.0105889 | 0.4778470  | 1508792   | 88  |
| 1856 |      | 12782 | 1.2742195 | 0.1843194 | 0.0119127 | 0.6526483  | 4731918   | 46  |
| 1820 |      | 12782 | 1.2762199 | 0.1964538 | 0.0120776 | 0.7004936  | 3224681   | 25  |
| 698  |      | 12782 | 1.2705685 | 0.9999999 | 0.3574640 | 42.5605441 | 0693797   |     |
| 1450 |      | 12782 | 1.1650007 | 0.9999999 | 0.3897703 | 48.6612159 | 6624928   |     |

| Pop | Hits | Pop   | Total      | Fold      | Enri      | Bonferron  | Benjamini  | FDR     |
|-----|------|-------|------------|-----------|-----------|------------|------------|---------|
| 36  |      | 16659 | 4.6486301  | 0.1016046 | 0.0062828 | 0.1244612  | 0109580    | 46      |
| 10  |      | 16659 | 9.1282191  | 0.2794869 | 0.0147891 | 0.3802799  | 1874041    | 15      |
| 8   |      | 19235 | 9.9518832  | 0.3946857 | 0.0191227 | 1.2833108  | 0191521    | 62      |
| 42  |      | 19235 | 3.7911936  | 0.4322661 | 0.0207484 | 1.4459704  | 2663190    | 4       |
| 26  |      | 16659 | 4.6811380  | 0.7976032 | 0.0619021 | 1.8397311  | 3222684    | 06      |
| 9   |      | 19113 | 8.8045881  | 0.9822437 | 0.2666103 | 2.6845805  | 3975760    | 84      |
| 9   |      | 19113 | 8.8045881  | 0.9822437 | 0.2666103 | 2.6845805  | 3975760    | 84      |
| 9   |      | 12983 | 8.4557769  | 0.8039438 | 0.1098652 | 2.7407117  | 4435335    | 24      |
| 9   |      | 12983 | 8.4557769  | 0.8039438 | 0.1098652 | 2.7407117  | 4435335    | 24      |
| 38  |      | 12983 | 3.6048312  | 0.9225758 | 0.1477740 | 4.2697789  | 4490271    | 3       |
| 10  |      | 12983 | 7.6101992  | 0.9239683 | 0.1406380 | 4.2994066  | 0186809    | 4       |
| 63  |      | 13528 | 2.7887033  | 0.9998812 | 0.2220344 | 5.6801391  | 8917784    | 6       |
| 6   |      | 16659 | 10.1424650 | 0.9990099 | 0.2059364 | 7.7259929  | 0885603    | 9       |
| 7   |      | 19113 | 9.0561478  | 0.9999999 | 0.5791709 | 12.0627734 | 8375617    | 3       |
| 7   |      | 7396  | 7.5334861  | 0.9986255 | 0.5612011 | 16.1339604 | 4419167    | 73      |
| 101 |      | 16659 | 2.1088295  | 0.9999999 | 0.4271074 | 21.8113517 | 8844741    | 8       |
| 4   |      | 19113 | 11.8861941 | 1.0       |           | 0.8745871  | 32.4593130 | 663313  |
| 4   |      | 19113 | 11.8861941 | 1.0       |           | 0.8745871  | 32.4593130 | 663313  |
| 4   |      | 16659 | 11.4102730 | 0.9999999 | 0.5147476 | 32.6334221 | 2726145    | 4       |
| 80  |      | 12782 | 2.1115638  | 0.9999868 | 0.2815331 | 30.3230451 | 1153677    | 4       |
| 27  |      | 16659 | 3.3808219  | 1.0       |           | 0.5543132  | 38.6424468 | 5968870 |
| 12  |      | 19235 | 5.3076710  | 0.9999999 | 0.3212318 | 41.0438714 | 0347407    |         |

| Pop | Hits | Pop   | Total     | Fold      | Enri      | Bonferron | Benjamini | FDR |
|-----|------|-------|-----------|-----------|-----------|-----------|-----------|-----|
| 21  |      | 19235 | 5.3076710 | 0.5613514 | 0.0270947 | 2.0978990 | 9599016   | 33  |
| 35  |      | 13528 | 3.7647495 | 0.9964992 | 0.1717931 | 3.5924255 | 8196858   | 35  |
| 97  |      | 13528 | 2.4149596 | 0.9982207 | 0.1847371 | 4.0136591 | 3749600   | 6   |
| 31  |      | 5085  | 4.0377171 | 0.3660526 | 0.0871264 | 3.3138526 | 5431138   | 9   |
| 23  |      | 13528 | 4.4558629 | 0.9999597 | 0.2392809 | 6.3372261 | 0588474   | 1   |

|     |       |           |           |           |            |           |
|-----|-------|-----------|-----------|-----------|------------|-----------|
| 23  | 13528 | 4.4558629 | 0.9999597 | 0.2392809 | 6.3372261  | 0.5884741 |
| 31  | 13528 | 3.7782432 | 0.9999898 | 0.2610531 | 7.1679203  | 0.1284355 |
| 31  | 13528 | 3.7782432 | 0.9999898 | 0.2610531 | 7.1679203  | 0.1284355 |
| 26  | 13528 | 3.9417249 | 0.9999999 | 0.3325172 | 11.7977790 | 0.933246  |
| 144 | 13528 | 1.9317580 | 0.9999999 | 0.3747944 | 15.1334965 | 0.1520823 |
| 4   | 12983 | 11.415298 | 0.9999999 | 0.5833666 | 31.1559470 | 0.8073248 |

| Pop  | Hits  | Pop       | Total     | Fold      | Enri       | Bonferron | Benjamini | FDR |
|------|-------|-----------|-----------|-----------|------------|-----------|-----------|-----|
| 832  | 19235 | 1.7033030 | 5.2991139 | 5.3003780 | 0.0013637  | 623799356 |           |     |
| 595  | 12782 | 1.6324695 | 0.0248283 | 0.0019321 | 0.0807718  | 441810267 |           |     |
| 476  | 19235 | 1.7394888 | 0.0726079 | 0.0037618 | 0.1937545  | 502993520 |           |     |
| 128  | 5085  | 2.4447115 | 0.0655150 | 0.0223334 | 0.4997479  | 321285913 |           |     |
| 467  | 19113 | 1.6628793 | 0.7857589 | 0.1306934 | 1.0346805  | 318848906 |           |     |
| 227  | 12782 | 1.9224223 | 0.2654975 | 0.0161089 | 0.9868034  | 04262504  |           |     |
| 227  | 12782 | 1.9224223 | 0.2654975 | 0.0161089 | 0.9868034  | 04262504  |           |     |
| 97   | 13528 | 2.4149596 | 0.9982207 | 0.1847371 | 4.0136591  | 37496006  |           |     |
| 1087 | 12782 | 1.3209415 | 0.6902918 | 0.0518839 | 3.6970840  | 84079283  |           |     |
| 620  | 12782 | 1.4304142 | 0.8005659 | 0.0676982 | 5.0498071  | 84316501  |           |     |
| 622  | 12782 | 1.4258148 | 0.8240726 | 0.0698445 | 5.4317526  | 18908126  |           |     |
| 193  | 19235 | 1.8975611 | 0.9391913 | 0.0790537 | 6.9508068  | 11512111  |           |     |
| 394  | 12782 | 1.5363324 | 0.9029399 | 0.0890770 | 7.2222306  | 58734108  |           |     |
| 419  | 12782 | 1.5118595 | 0.9173703 | 0.0914446 | 7.7009546  | 47323632  |           |     |
| 125  | 12782 | 2.0271013 | 0.9563686 | 0.1095240 | 9.5759978  | 65393926  |           |     |
| 144  | 13528 | 1.9317580 | 0.9999999 | 0.3747944 | 15.1334965 | 0.1520823 |           |     |
| 100  | 19235 | 2.2292218 | 0.9959994 | 0.1289299 | 13.2429098 | 54553153  |           |     |
| 180  | 5085  | 1.8253846 | 0.8057267 | 0.2389692 | 11.4095622 | 0.3436252 |           |     |
| 329  | 12782 | 1.5403505 | 0.9906725 | 0.1488780 | 13.9503674 | 27380606  |           |     |
| 64   | 13528 | 2.5163690 | 0.9999999 | 0.4172269 | 17.7685439 | 15756275  |           |     |
| 64   | 12782 | 2.4195002 | 0.9980552 | 0.1878637 | 18.1788898 | 09116782  |           |     |
| 75   | 12782 | 2.2523348 | 0.9992507 | 0.2013941 | 20.6490281 | 04697244  |           |     |
| 306  | 12782 | 1.4721142 | 0.9999972 | 0.2990966 | 33.7138611 | 166654524 |           |     |
| 71   | 19235 | 2.2426779 | 0.9999999 | 0.3071297 | 38.7922113 | 9416488   |           |     |
| 56   | 13528 | 2.3529684 | 1.0       | 0.7132640 | 47.1907470 | 1695681   |           |     |
| 56   | 13528 | 2.3529684 | 1.0       | 0.7132640 | 47.1907470 | 1695681   |           |     |
| 130  | 5085  | 1.8053254 | 0.9975614 | 0.4875139 | 35.9069619 | 7099196   |           |     |
| 313  | 13528 | 1.4500366 | 1.0       | 0.7279907 | 49.0260724 | 6895899   |           |     |
| 49   | 12983 | 2.4849630 | 0.9999999 | 0.6734699 | 46.7379099 | 85824345  |           |     |
| 114  | 13528 | 1.7979797 | 1.0       | 0.7764283 | 57.3819532 | 4819595   |           |     |

| Pop | Hits  | Pop       | Total     | Fold      | Enri      | Bonferron | Benjamini | FDR |
|-----|-------|-----------|-----------|-----------|-----------|-----------|-----------|-----|
| 24  | 16659 | 5.0712328 | 0.6106404 | 0.0401813 | 1.0903894 | 329109765 |           |     |
| 22  | 16659 | 4.8407222 | 0.9656207 | 0.1215770 | 3.8416924 | 442175038 |           |     |
| 23  | 16659 | 4.6302561 | 0.9865822 | 0.1475777 | 4.8875634 | 64185285  |           |     |
| 24  | 16659 | 4.4373287 | 0.9956413 | 0.1764478 | 6.1225523 | 383406132 |           |     |
| 22  | 7396  | 4.1947820 | 0.9274771 | 0.4810581 | 6.7660736 | 30719616  |           |     |
| 49  | 13528 | 2.9878964 | 0.9999996 | 0.2959841 | 9.0959733 | 9129009   |           |     |

|     |       |           |           |           |            |         |
|-----|-------|-----------|-----------|-----------|------------|---------|
| 9   | 16659 | 6.7616438 | 0.9999999 | 0.4590869 | 25.3861229 | 447771  |
| 162 | 13528 | 1.7171182 | 1.0       | 0.6490770 | 39.4293625 | 2193522 |

| Pop | Hits | Pop   | Total     | Fold      | Enri      | Bonferron  | Benjamini | FDR |
|-----|------|-------|-----------|-----------|-----------|------------|-----------|-----|
| 137 |      | 12983 | 2.3330537 | 0.4260778 | 0.0540127 | 0.9425643  | 988136501 |     |
| 111 |      | 19235 | 2.4386596 | 0.5778386 | 0.0274349 | 2.1943537  | 85034231  |     |
| 52  |      | 12983 | 3.2196997 | 0.8050664 | 0.1032753 | 2.7502364  | 909707255 |     |
| 95  |      | 12983 | 2.4032208 | 0.9594084 | 0.1551886 | 5.3183197  | 239070275 |     |
| 24  |      | 12983 | 3.8050996 | 0.9999999 | 0.4996376 | 24.6806639 | 03708332  |     |
| 20  |      | 12983 | 3.8050996 | 0.9999999 | 0.6740974 | 45.7683741 | 8381092   |     |
| 20  |      | 16659 | 3.8034246 | 1.0       | 0.6306942 | 47.7113367 | 4353633   |     |

| Pop | Hits | Pop   | Total     | Fold      | Enri      | Bonferron  | Benjamini | FDR |
|-----|------|-------|-----------|-----------|-----------|------------|-----------|-----|
| 10  |      | 12983 | 7.6101992 | 0.9239683 | 0.1406380 | 4.2994066  | 01868094  |     |
| 11  |      | 19113 | 7.2037539 | 0.9999284 | 0.4115511 | 6.2403178  | 9053473   |     |
| 11  |      | 19113 | 7.2037539 | 0.9999284 | 0.4115511 | 6.2403178  | 9053473   |     |
| 11  |      | 16659 | 6.9153175 | 0.9974688 | 0.1863093 | 6.7137151  | 97839187  |     |
| 12  |      | 19235 | 6.6345888 | 0.9452190 | 0.0796334 | 7.2003869  | 39347014  |     |
| 19  |      | 19235 | 5.0283199 | 0.9530250 | 0.0814402 | 7.5667081  | 61112734  |     |
| 12  |      | 16659 | 6.3390410 | 0.9997994 | 0.2401660 | 9.4225716  | 56974899  |     |
| 12  |      | 16659 | 6.3390410 | 0.9997994 | 0.2401660 | 9.4225716  | 56974899  |     |
| 11  |      | 7396  | 5.9925457 | 0.9781648 | 0.5345947 | 9.7069248  | 10907115  |     |
| 57  |      | 19235 | 2.7935110 | 0.9928570 | 0.1190094 | 11.9392448 | 7373973   |     |
| 8   |      | 19235 | 7.9615066 | 0.9980320 | 0.1409854 | 14.8121247 | 81671166  |     |
| 8   |      | 19235 | 7.9615066 | 0.9980320 | 0.1409854 | 14.8121247 | 81671166  |     |
| 10  |      | 19113 | 6.3393034 | 1.0       | 0.8790076 | 31.9525487 | 0120091   |     |
| 10  |      | 19113 | 6.3393034 | 1.0       | 0.8790076 | 31.9525487 | 0120091   |     |

| Pop | Hits | Pop   | Total     | Fold      | Enri      | Bonferron  | Benjamini | FDR |
|-----|------|-------|-----------|-----------|-----------|------------|-----------|-----|
| 19  |      | 9079  | 5.5779234 | 0.5465689 | 0.1463059 | 4.2671403  | 77207612  |     |
| 19  |      | 16659 | 4.8043258 | 0.9999024 | 0.2506952 | 10.1786751 | 0610998   |     |
| 19  |      | 16659 | 4.8043258 | 0.9999024 | 0.2506952 | 10.1786751 | 0610998   |     |
| 19  |      | 16659 | 4.8043258 | 0.9999024 | 0.2506952 | 10.1786751 | 0610998   |     |
| 19  |      | 7396  | 4.1632423 | 0.9983370 | 0.5991484 | 15.7061459 | 00017265  |     |
| 21  |      | 13528 | 4.1830550 | 0.9999999 | 0.4333904 | 19.1984479 | 9279672   |     |

| Pop | Hits | Pop   | Total     | Fold      | Enri      | Bonferron  | Benjamini | FDR |
|-----|------|-------|-----------|-----------|-----------|------------|-----------|-----|
| 42  |      | 13528 | 3.1372912 | 0.9999999 | 0.3272164 | 11.3538304 | 27203338  |     |
| 42  |      | 13528 | 3.1372912 | 0.9999999 | 0.3272164 | 11.3538304 | 27203338  |     |
| 42  |      | 13528 | 3.1372912 | 0.9999999 | 0.3272164 | 11.3538304 | 27203338  |     |
| 43  |      | 13528 | 3.0643310 | 0.9999999 | 0.3502930 | 13.0207459 | 88555948  |     |
| 43  |      | 13528 | 3.0643310 | 0.9999999 | 0.3502930 | 13.0207459 | 88555948  |     |

| Pop | Hits | Pop   | Total      | Fold      | Enri      | Bonferron          | Benjamini | FDR |
|-----|------|-------|------------|-----------|-----------|--------------------|-----------|-----|
| 25  |      | 5085  | 5.0067692  | 0.1094301 | 0.0285577 | 0.8532316613421242 |           |     |
| 109 |      | 13528 | 2.4177290  | 0.9516186 | 0.1061094 | 1.940407325415483  |           |     |
| 58  |      | 13528 | 3.0291088  | 0.9895115 | 0.1502111 | 2.9055688096447763 |           |     |
| 79  |      | 13528 | 2.5945531  | 0.9990159 | 0.1945616 | 4.380727085395952  |           |     |
| 71  |      | 13528 | 2.6806902  | 0.9996493 | 0.2086301 | 5.016950944962472  |           |     |
| 85  |      | 13528 | 2.4114081  | 0.9999983 | 0.2831162 | 8.253163489029802  |           |     |
| 40  |      | 13528 | 3.2941558  | 0.9999988 | 0.2836680 | 8.469216559992654  |           |     |
| 40  |      | 13528 | 3.2941558  | 0.9999988 | 0.2836680 | 8.469216559992654  |           |     |
| 41  |      | 13528 | 3.2138105  | 0.9999998 | 0.3049693 | 9.838140120427353  |           |     |
| 69  |      | 13528 | 2.5462074  | 0.9999999 | 0.3310000 | 11.275277148234853 |           |     |
| 42  |      | 13528 | 3.1372912  | 0.9999999 | 0.3272164 | 11.353830427203338 |           |     |
| 153 |      | 13528 | 1.9138160  | 0.9999999 | 0.3553328 | 13.485662707981238 |           |     |
| 81  |      | 13528 | 2.3497407  | 0.9999999 | 0.3652433 | 14.179524506029706 |           |     |
| 3   |      | 19235 | 15.9230130 | 0.9984719 | 0.1430496 | 15.36487883192298  |           |     |
| 9   |      | 13528 | 6.5069745  | 1.0       | 0.5772872 | 29.599412377263036 |           |     |
| 16  |      | 13528 | 4.5752164  | 1.0       | 0.5854018 | 30.550163467826497 |           |     |
| 192 |      | 13528 | 1.6775793  | 1.0       | 0.6049452 | 32.33273826437121  |           |     |
| 52  |      | 13528 | 2.5339660  | 1.0       | 0.6150913 | 34.702579277030864 |           |     |
| 11  |      | 13528 | 5.3238882  | 1.0       | 0.7114698 | 46.5943586866337   |           |     |
| 56  |      | 13528 | 2.3529684  | 1.0       | 0.7132640 | 47.19074701695681  |           |     |
| 47  |      | 13528 | 2.4920327  | 1.0       | 0.7356609 | 50.632467029135974 |           |     |
| 222 |      | 13528 | 1.5168285  | 1.0       | 0.7832842 | 59.755573466592594 |           |     |

| Pop | Hits | Pop   | Total      | Fold      | Enri      | Bonferron          | Benjamini | FDR |
|-----|------|-------|------------|-----------|-----------|--------------------|-----------|-----|
| 6   |      | 19113 | 10.5655050 | 0.9999887 | 0.4511156 | 7.4056980838541175 |           |     |
| 6   |      | 19113 | 10.5655050 | 0.9999887 | 0.4511156 | 7.4056980838541175 |           |     |
| 5   |      | 7396  | 7.9101604  | 0.9999999 | 0.9359107 | 51.981974459884796 |           |     |

| Pop | Hits | Pop  | Total      | Fold      | Enri      | Bonferron         | Benjamini | FDR |
|-----|------|------|------------|-----------|-----------|-------------------|-----------|-----|
| 6   |      | 1437 | 10.1914890 | 0.4696535 | 0.2717511 | 5.234847994548131 |           |     |
| 12  |      | 1437 | 6.3696808  | 0.5319486 | 0.2235779 | 6.233419428538845 |           |     |
| 12  |      | 1437 | 5.0957446  | 0.9951922 | 0.6561349 | 36.39678343414137 |           |     |

| Pop | Hits | Pop   | Total     | Fold      | Enri      | Bonferron          | Benjamini | FDR |
|-----|------|-------|-----------|-----------|-----------|--------------------|-----------|-----|
| 26  |      | 12983 | 4.0977996 | 0.9951848 | 0.2341737 | 8.699043907444015  |           |     |
| 14  |      | 13528 | 5.2288188 | 0.9999999 | 0.4419694 | 19.962363359096468 |           |     |
| 12  |      | 12983 | 5.0734661 | 0.9999999 | 0.6638892 | 46.86130388103569  |           |     |

| Pop | Hits | Pop   | Total     | Fold      | Enri      | Bonferron         | Benjamini | FDR |
|-----|------|-------|-----------|-----------|-----------|-------------------|-----------|-----|
| 70  |      | 19235 | 2.9571310 | 0.5152847 | 0.0246629 | 1.846028113102871 |           |     |
| 90  |      | 12782 | 2.0333578 | 0.9999844 | 0.2850605 | 29.94531792546844 |           |     |
| 104 |      | 12782 | 1.8949932 | 0.9999994 | 0.3226012 | 37.07166958647179 |           |     |
| 108 |      | 12782 | 1.8248082 | 0.9999999 | 0.3687498 | 45.45925421584089 |           |     |



| Pop | Hits | Pop   | Total     | Fold      | Enri      | Bonferron  | Benjamini  | FDR      |
|-----|------|-------|-----------|-----------|-----------|------------|------------|----------|
|     | 41   | 9079  | 3.4465217 | 0.8239052 | 0.1951437 | 9.1316471  | 74806501   |          |
|     | 41   | 16659 | 2.9685265 | 0.9999999 | 0.4503813 | 23.7628289 | 3385383    |          |
|     | 48   | 16659 | 2.5356164 | 1.0       |           | 0.6186927  | 45.4013302 | 18025315 |

| Pop | Hits | Pop   | Total     | Fold      | Enri      | Bonferron  | Benjamini  | FDR      |
|-----|------|-------|-----------|-----------|-----------|------------|------------|----------|
|     | 62   | 16659 | 2.6992045 | 0.9999355 | 0.2535456 | 10.6102617 | 2668289    |          |
|     | 72   | 9079  | 2.6985786 | 0.8010561 | 0.2060033 | 8.5183367  | 23152508   |          |
|     | 55   | 19113 | 2.8815015 | 0.9999999 | 0.5862866 | 11.7610343 | 355078227  |          |
|     | 210  | 19113 | 1.7357616 | 0.9999999 | 0.7720047 | 21.3006690 | 21951357   |          |
|     | 82   | 19113 | 2.3192573 | 0.9999999 | 0.7643310 | 21.6456965 | 34036286   |          |
|     | 48   | 9079  | 2.9439040 | 0.9829909 | 0.3346224 | 20.1187359 | 99609918   |          |
|     | 72   | 16659 | 2.3243150 | 0.9999999 | 0.4729308 | 26.8489160 | 38565164   |          |
|     | 87   | 16659 | 2.0984411 | 1.0       |           | 0.5373696  | 36.1083046 | 57957014 |
|     | 17   | 7396  | 3.8775296 | 0.9999999 | 0.8850835 | 40.5427814 | 4463634    |          |
|     | 48   | 16659 | 2.5356164 | 1.0       |           | 0.6186927  | 45.4013302 | 18025315 |
|     | 84   | 16659 | 1.9922700 | 1.0       |           | 0.7006095  | 55.6490793 | 10084424 |

| Pop | Hits | Pop   | Total     | Fold      | Enri      | Bonferron  | Benjamini | FDR |
|-----|------|-------|-----------|-----------|-----------|------------|-----------|-----|
|     | 22   | 16659 | 4.1491905 | 0.9999999 | 0.3903066 | 18.7016617 | 5589797   |     |
|     | 43   | 1950  | 3.2392026 | 0.3008021 | 0.3008021 | 12.7303600 | 58401558  |     |
|     | 130  | 16659 | 1.8724552 | 0.9999999 | 0.5194836 | 32.4201644 | 7430917   |     |

| Pop | Hits | Pop   | Total     | Fold      | Enri      | Bonferron  | Benjamini | FDR |
|-----|------|-------|-----------|-----------|-----------|------------|-----------|-----|
|     | 32   | 16659 | 3.3279965 | 0.9999999 | 0.4449050 | 23.9415728 | 55752447  |     |
|     | 33   | 16659 | 3.2271481 | 0.9999999 | 0.4694874 | 27.1547218 | 59104725  |     |
|     | 25   | 16659 | 3.6512876 | 0.9999999 | 0.5020932 | 29.9976259 | 67836584  |     |

| Pop | Hits | Pop   | Total     | Fold      | Enri      | Bonferron  | Benjamini | FDR |
|-----|------|-------|-----------|-----------|-----------|------------|-----------|-----|
|     | 67   | 12782 | 2.5212703 | 0.9566907 | 0.1060639 | 9.5975330  | 62227603  |     |
|     | 18   | 12782 | 3.9103034 | 0.9999998 | 0.3349895 | 39.2397230 | 7928963   |     |
|     | 18   | 12782 | 3.9103034 | 0.9999998 | 0.3349895 | 39.2397230 | 7928963   |     |

| Pop | Hits | Pop   | Total     | Fold      | Enri      | Bonferron  | Benjamini  | FDR      |
|-----|------|-------|-----------|-----------|-----------|------------|------------|----------|
|     | 7    | 7396  | 7.5334861 | 0.9986255 | 0.5612011 | 16.1339604 | 41916773   |          |
|     | 18   | 19113 | 4.4022940 | 1.0       |           | 0.8854507  | 34.5703200 | 867837   |
|     | 21   | 16659 | 3.6223091 | 1.0       |           | 0.6840275  | 53.3876212 | 75348216 |

| Pop | Hits | Pop   | Total     | Fold      | Enri      | Bonferron  | Benjamini | FDR |
|-----|------|-------|-----------|-----------|-----------|------------|-----------|-----|
|     | 7    | 16659 | 8.6935420 | 0.9999902 | 0.2807927 | 12.5488317 | 62072531  |     |

|    |       |           |           |           |                    |
|----|-------|-----------|-----------|-----------|--------------------|
| 9  | 19235 | 7.0768947 | 0.9998683 | 0.1800984 | 20.539231531199498 |
| 47 | 12983 | 2.5907061 | 0.9999999 | 0.6461841 | 40.18378116939192  |
| 5  | 16659 | 9.1282191 | 1.0       | 0.6293470 | 46.979116583938875 |
| 5  | 7396  | 7.9101604 | 0.9999999 | 0.9359107 | 51.981974459884796 |

| Pop Hits | Pop   | Total     | Fold      | Enri      | Bonferron          | Benjamini | FDR |
|----------|-------|-----------|-----------|-----------|--------------------|-----------|-----|
| 180      | 13528 | 1.7894179 | 0.9999999 | 0.4174751 | 18.068187878528363 |           |     |
| 230      | 13528 | 1.5913796 | 1.0       | 0.6225945 | 36.0849079804306   |           |     |
| 122      | 13528 | 1.8000851 | 1.0       | 0.7350679 | 50.1471524173341   |           |     |
| 92       | 13528 | 1.9096555 | 1.0       | 0.7759328 | 58.54927906090887  |           |     |

| Pop Hits | Pop   | Total     | Fold      | Enri      | Bonferron          | Benjamini | FDR |
|----------|-------|-----------|-----------|-----------|--------------------|-----------|-----|
| 71       | 13528 | 2.2682763 | 1.0       | 0.6001455 | 32.39037085425197  |           |     |
| 27       | 12983 | 3.3823107 | 0.9999999 | 0.6321775 | 36.907860345151086 |           |     |
| 12       | 12983 | 5.0734661 | 0.9999999 | 0.6638892 | 46.86130388103569  |           |     |

Log P-value

-18.9761  
-18.9761  
-18.8379  
-18.8379  
-18.8379  
-18.7585  
-18.3888  
-17.363  
-16.92  
-15.5706  
-15.5706  
-15.9542  
-14.6035  
-11.8323  
-10.9593  
-10.3956  
-7.53196  
-5.6028  
-5.59169  
-5.64861  
-3.07844

-18.851  
-17.8593  
-13.6758  
-12.5142  
-12.639  
-12.435  
-10.3521  
-7.95756  
-4.64929  
-4.35297

-13.4997  
-9.44781  
-7.80636  
-6.47411  
-5.4974  
-5.22751  
-5.22751

-3.34613  
-3.88504  
-1.96204  
-1.6171  
-1.6171

-9.44781  
-1.9418  
-1.22167

-8.59644  
-7.33497  
-5.63751  
-4.85274  
-4.85274  
-4.67516  
-4.67516  
-4.80831  
-4.6581  
-5.17219  
-4.47876  
-4.36306  
-4.36306  
-4.40963  
-4.84633  
-4.23705  
-4.7889  
-4.16868  
-3.93155  
-3.84379  
-3.60166  
-2.78915  
-2.85616  
-2.67743  
-2.67743  
-2.33821  
-1.8877  
-1.76903  
-1.74015  
-1.22181  
-0.75203  
-0.68052  
-0.58036  
-0.52192

-0.48192  
-0.46393  
-0.32555  
-0.2084  
-0.11201  
-0.10939  
-0.11074

-6.02509  
-5.8601  
-5.35623  
-5.29887  
-3.83809  
-2.11431  
-0.46755  
-0.29312  
-0.29711  
-0.28443  
-0.27467  
-0.25952

-5.16269  
-4.14565  
-3.4507  
-3.88478  
-3.12053  
-2.83924  
-3.10028  
-2.85312  
-2.18949  
-1.9418  
-2.34014  
-1.46866  
-1.94851  
-1.14802  
-1.14802  
-1.14802  
-0.71749  
-1.18104  
-0.3954

-3.14818

-2.99883  
-2.34497  
-2.48131  
-2.16753  
-0.55784  
-1.08871

-3.09388  
-2.8272  
-3.05099  
-2.43964  
-2.67563  
-2.89821  
-1.98634  
-2.47169  
-1.22181  
-0.55872  
-0.45997  
-0.82127  
-0.65237  
-0.21255  
-0.37178  
-0.02404  
-0.02404

-2.85567  
-2.83788  
-1.56295  
-1.99515  
-1.96292  
-1.64947  
-1.89325  
-1.22796  
-0.89838  
-1.24412  
-1.2251  
-0.42495  
-0.77851  
-0.17568

-3.89137  
-0.43354

-0.40905

-1.95016

-0.40274

-0.60241

-1.97515

-1.92399

-1.91802

-0.44677

-0.40919

-2.20184

-1.83006

-1.71845

-1.68301

-1.20829

-0.57412

-0.57412

-0.95914

-0.95914

-0.8304

-0.8519

-0.65358

-0.68627

-0.23719

-0.25088

-0.36946

-0.0582

-0.0582

-0.28841

-0.55047

-0.25624

-0.49318

-1.56712

-0.76499

-0.73345

-1.05985

-0.62109

-0.62109  
-0.58327  
-0.58327  
-0.47819  
-0.42621  
-0.23406

-4.27569  
-2.71397  
-2.4246  
-1.65104  
-0.88375  
-1.79293  
-1.79293  
-0.73345  
-1.28497  
-1.16942  
-1.15587  
-1.10208  
-1.05023  
-1.03884  
-0.96049  
-0.42621  
-0.88965  
-0.62166  
-0.82717  
-0.37963  
-0.72616  
-0.69595  
-0.52419  
-0.51268  
-0.14675  
-0.14675  
-0.31201  
-0.13787  
-0.17168  
-0.1099

-1.39598  
-0.91515  
-0.83098  
-0.75338  
-0.3178  
-0.52873



-0.33811  
-0.1877

-1.2675  
-1.5617  
-0.986  
-0.80914  
-0.30134  
-0.17128  
-0.20018

-0.8519  
-0.38558  
-0.38558  
-0.72977  
-1.0989  
-1.08916  
-0.61949  
-0.61949  
-0.27198  
-0.92442  
-0.85083  
-0.85083  
-0.05601  
-0.05601

-0.83474  
-0.60085  
-0.60085  
-0.60085  
-0.22247  
-0.36312

-0.48516  
-0.48516  
-0.48516  
-0.45557  
-0.45557

-1.54428  
-0.97425  
-0.8233  
-0.71094  
-0.68062  
-0.54804  
-0.54719  
-0.54719  
-0.51574  
-0.48017  
-0.48516  
-0.44936  
-0.43742  
-0.84451  
-0.23861  
-0.23255  
-0.21828  
-0.21106  
-0.14784  
-0.14675  
-0.13332  
-0.10608

-0.34571  
-0.34571  
-0.02877

-0.56583  
-0.65057  
-0.18301

-0.63046  
-0.35461  
-0.1779

-1.60795  
-0.54506  
-0.49133  
-0.43327

-0.70965  
-0.34642  
-0.20853

-0.59594  
-0.68613  
-0.23189  
-0.11238  
-0.11672  
-0.47544  
-0.3252  
-0.26973  
-0.05302  
-0.20853  
-0.15452

-0.40859  
-0.52172  
-0.28443

-0.35173  
-0.32838  
-0.29922

-0.97443  
-0.47497  
-0.47497

-0.25088  
-0.05284  
-0.16493

-0.55161

-0.74449  
-0.18964  
-0.20111  
-0.02877

-0.37937  
-0.20579  
-0.13367  
-0.11018

-0.22174  
-0.19916  
-0.1779
